# 1 **Meta-analysis of the genetic loci of pigment pattern evolution in** 2 **vertebrates**

3 Joel Elkin<sup>1,\*</sup>, Arnaud Martin<sup>2</sup>, Virginie Courtier-Orgogozo<sup>3</sup>, M. Emília Santos<sup>1,\*</sup>

4 <sup>1</sup>Department of Zoology, University of Cambridge, Cambridge, UK

5 <sup>2</sup>Department of Biological Sciences, The George Washington University, Washington, DC,  
6 USA.

7 <sup>3</sup>Institut Jacques Monod, Université de Paris, CNRS, Paris, France

8 \*Authors for correspondence: [joel.elkin416@gmail.com](mailto:joel.elkin416@gmail.com) and [es754@cam.ac.uk](mailto:es754@cam.ac.uk)

9

## 10 **Abstract**

11 Vertebrate pigmentation patterns are amongst the best characterised model systems for  
12 studying the genetic basis of adaptive evolution. The wealth of available data on the genetic  
13 basis for pigmentation evolution allows for meta-analysis of trends and quantitative testing of  
14 evolutionary hypotheses. We employed Gephebase, a database of genetic variants  
15 associated with natural and domesticated trait variation, to examine trends in how *cis*-  
16 regulatory and coding mutations contribute to vertebrate pigmentation phenotypes, as well as  
17 factors that favour one mutation type over the other. We found that studies with lower  
18 ascertainment bias identified higher proportions of *cis*-regulatory mutations, and that *cis*-  
19 regulatory mutations were more common amongst animals harboring a higher number of  
20 pigment cell classes. We classified pigmentation traits firstly according to their physiological  
21 basis and secondly according to whether they affect colour or pattern, and identified that  
22 carotenoid-based pigmentation and variation in pattern boundaries are preferentially  
23 associated with *cis*-regulatory change. We also classified genes according to their  
24 developmental, cellular, and molecular functions. We found that genes implicated in upstream  
25 developmental processes had greater *cis*-regulatory proportions than downstream cellular  
26 function genes, and that ligands were associated with higher *cis*-regulatory proportions than  
27 their respective receptors. Based on these trends, we discuss future directions for research in  
28 vertebrate pigmentation evolution.

## 29 Introduction

30 One of the central goals of evolutionary biology is to understand the genetic basis of  
31 organismal diversity. Determining which genes and mutations underlie adaptive traits is  
32 essential for understanding how evolutionary forces shape organismal variation (Barrett and  
33 Hoekstra, 2011). In this regard, vertebrate pigmentation is a powerful system for integrating  
34 historically disparate fields of evolutionary research, and ultimately identifying the genetic  
35 mechanisms underlying evolutionary change (Cuthill et al., 2017; Hubbard et al., 2010;  
36 Kronforst et al., 2012; Orteu and Jiggins, 2020).

37 Vertebrate pigmentation offers a diverse array of phenotypes, with intra- and interspecific  
38 variation ranging from whole-body colour changes, to highly localised pattern alterations  
39 (Figure 1). Similarly, the adaptive significance of pigment patterns can be attributed to multiple  
40 distinct selection pressures, including thermoregulation, camouflage, aposematism, sexual  
41 display, and ultraviolet protection (Protas and Patel, 2008). The rapid evolution of vertebrate  
42 pigmentation patterns, and their evolutionary significance, allows for both mapping of  
43 individual mutations to their resultant phenotypes, and inference of the evolutionary pressures  
44 driving the selection of said phenotypes. As such, there have been many studies identifying  
45 loci associated with a wide range of pigmentation phenotypes in different vertebrate taxa. A  
46 meta-analysis of these individual case studies may reveal broad trends underlying pigment  
47 pattern evolution and help to inform the future direction of vertebrate pigmentation research.

48 Here, we first outline the basic biology of vertebrate pigmentation, as well as the key  
49 differences between different vertebrate clades. We then utilise a dataset of vertebrate  
50 pigmentation literature to analyse trends in the underlying genetics. For this purpose, we used  
51 Gephebase (<https://www.gephebase.org/>) - a knowledge base dedicated to the compilation of  
52 literature on genes and mutations underlying natural and domesticated organismal variation  
53 in Eukaryotes (Courtier-Orgogozo et al., 2020). Gephebase gathers published data on  
54 evolutionarily relevant mutations, each entry representing a causal association between an  
55 allelic change at a given locus and trait variation between individuals or species. Each entry  
56 includes information relating to the species/population, the type of trait, the gene, the nature  
57 of the mutation(s), whether they represent null alleles, and the study that identified it. Using  
58 the vertebrate pigmentation entries in this database, we focused on the relative abundance of  
59 *cis*-regulatory and coding mutations contributing to vertebrate pigmentation evolution. Finally,  
60 we discuss the direction of future vertebrate pigmentation research and the role to be played  
61 by recent model systems and innovative approaches.

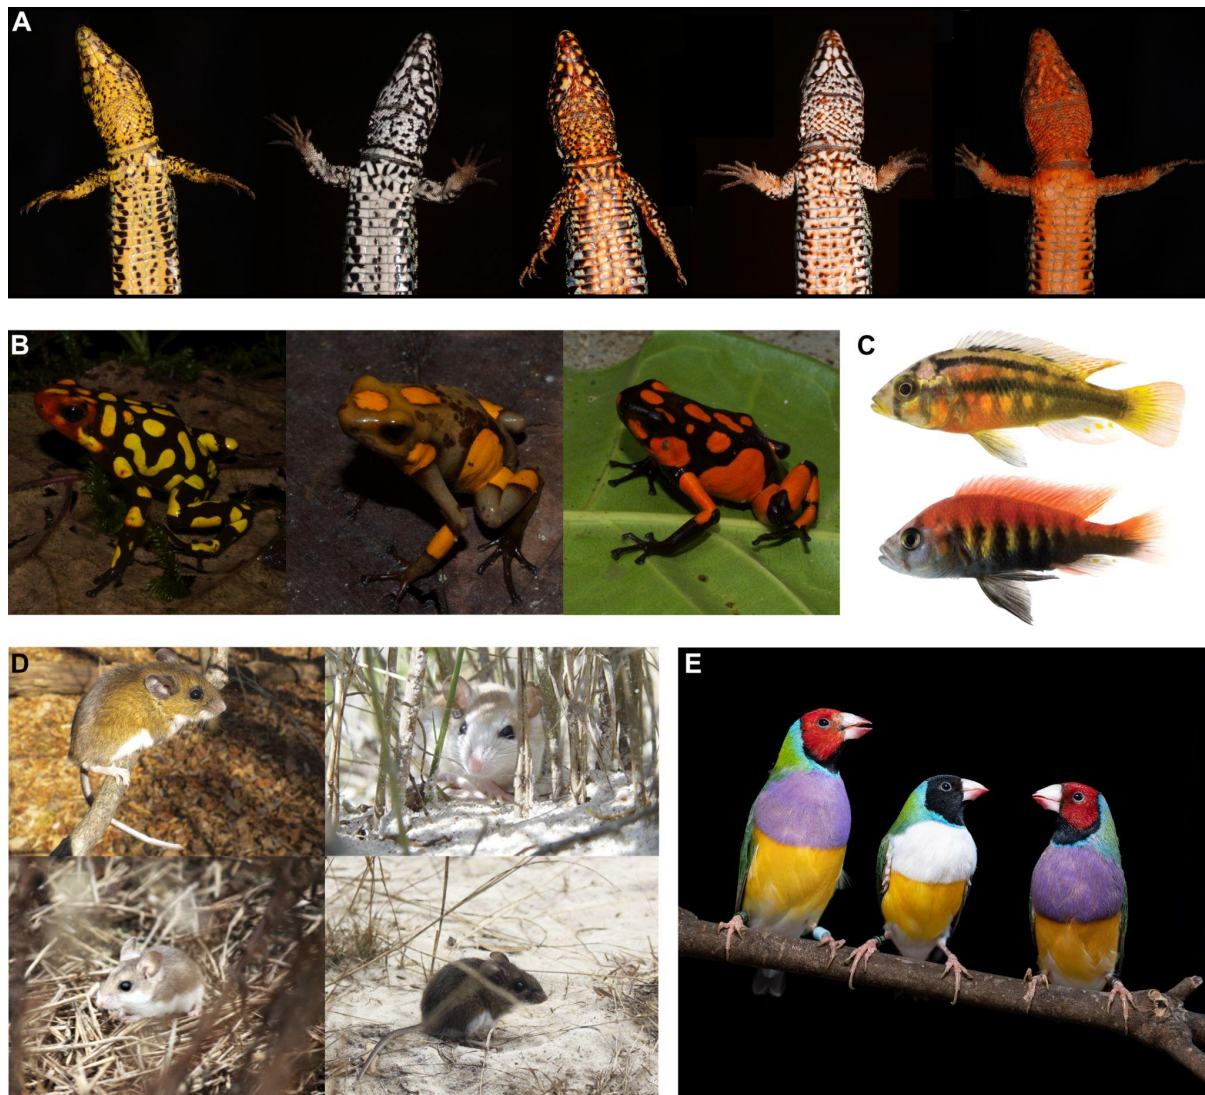

62

63 **Figure 1.** Examples of vertebrate colour pattern diversity. **A:** Sympatric colour morphs of the  
64 European common wall lizard (*Podarcis muralis*) (Andrade et al., 2019). The colour morphs  
65 differ in a range of key morphological, physiological, or behavioural traits. Photographs  
66 courtesy of Pedro Andrade and Miguel Carneiro. **B:** Allopatric morphs of harlequin poison  
67 frogs (*Oophaga histrionica* complex). Amphibian colour patterns are extremely under-  
68 represented in pigmentation evolutionary genetic studies. Photographs courtesy of  
69 Roberto Marquez. **C:** Two species of Lake Victoria cichlids. *Pundamilia nyererei* (top) and  
70 *Haplochromis sauvagei* (bottom) showing differences in horizontal stripes and vertical  
71 bars (Kratochwil et al., 2018). Photographs courtesy of Claudius Kratochwil. **D:** Different  
72 species of *Peromyscus* mice showing differences in colour phenotypes – *P. maniculatus*  
73 *nubiterrae* (top left, image credit to Evan P Kingsley), *P. polionotus phasma* (top right, image  
74 credit to JB Miller), *P. polionotus sumneri* (bottom left, image credit to Nicole Bedford) and *P.*  
75 *gossypinus* (bottom right, image credit to Nicole Bedford). Differences in melanic coat  
76 colouration correlate with the colour of the background substrate and evolved as a result of

77 strong predation. Photographs adapted from Bedford and Hoekstra, 2015. **E:** Red and black  
78 head colour polymorphism in the Gouldian finch (*Erythrura gouldiae*), morphs display  
79 differences in aggressivity and reproductive success (Toomey et al., 2018). Photograph  
80 courtesy of Ricardo Jorge Lopes and Miguel Carneiro.

81

## 82 **Vertebrate pigmentation**

83 In vertebrates, most colour patterns derive from specialised pigment cells which produce either  
84 pigments or reflective structures. These cells derive from the migratory neural crest cell  
85 population, which emerges from the dorsal neural tube during early vertebrate development  
86 (Lapedriza et al., 2014). Neural crest cells then delaminate and undergo some of the longest  
87 migrations of any embryonic cell type to give rise to multiple derivatives such as neurons and  
88 glia of the peripheral nervous system, smooth muscle, craniofacial cartilage and bone, and  
89 pigment cells (Simões-Costa and Bronner, 2015).

90 Across vertebrate clades there is considerable diversity in the cell types producing colours. In  
91 fish, amphibians, and non-avian reptiles, there are multiple distinct classes of pigmented and  
92 structurally coloured cells, called chromatophores. These classes contain different  
93 combinations of pigments and/or reflective structures, and therefore exhibit different ranges of  
94 colours. Across these clades up to at least nine chromatophore classes are recognised. The  
95 most common chromatophore classes that utilise pigments are melanophores (brown/black  
96 melanin pigments) and xanthophores (yellow/orange carotenoid pigments). These cells  
97 produce pigment-based colour via the deposition of their respective pigment molecules, which  
98 selectively absorb specific wavelengths of light. In contrast, structural colouration results from  
99 the presence of reflective structures, such that structural colour is variable depending on the  
100 angle from which it is viewed. The most common structural chromatophore is the iridophore,  
101 which appears silvery or blue due to the arrangement of layered purine platelets of variable  
102 size, shape, and arrangement (Parichy, 2021; Singh and Nüsslein-Volhard, 2015).

103 Rarer chromatophore classes include red erythrophores and blue cyanophores, as well as two  
104 distinct classes of white leucophores with different regulatory profiles, developmental origins,  
105 and chemical compositions (Goda and Fujii, 1995; Huang et al., 2021; Lewis et al., 2019).  
106 Each chromatophore class present in an organism goes through extensive cell movements  
107 and cell-cell interactions to form a final colour pattern. Variation in the abundance,  
108 combinations, and arrangements of chromatophores generates the intricate and diverse  
109 colour patterns seen in fish, amphibians, and reptiles.

110 In contrast, mammals and birds have independently lost most pigment cell diversity and mainly  
111 retain only one pigmentary cell type, the melanocyte (equivalent to the melanophore) (Kelsh  
112 et al., 2009). Melanocyte differentiation and development remains highly conserved between  
113 vertebrates, but differences exist. Unlike melanophores, melanocytes produce two melanin  
114 pigment types in different shades – brownish-black eumelanin, and reddish pheomelanin. The  
115 ability to switch melanogenesis between eumelanin and pheomelanin production is specific to  
116 birds and mammals (McNamara et al., 2021). Mammals and birds develop complex  
117 pigmentation patterns by temporally and spatially regulating melanogenesis switching, as  
118 opposed to using different chromatophore classes for different colours. Furthermore, while  
119 other vertebrates retain pigments within the respective chromatophore, in birds and mammals  
120 melanin is secreted from melanocytes into the skin or the integumentary appendages, such  
121 as feathers and hairs (McNamara et al., 2021). Finally, birds additionally exhibit an array of  
122 yellow, orange and red colours due to the processing and accumulation of dietary carotenoid  
123 pigments (Toews et al., 2017).

124

## 125 **The role of *cis*-regulatory and coding mutations in evolution**

126 The extent to which evolution is predictable on the level of genetic variation is a long-standing  
127 topic in evolutionary biology. One important question concerns the relative prevalence of *cis*-  
128 regulatory and coding sequence mutations (Carroll, 2008; Hoekstra and Coyne, 2007; Martin  
129 and Courtier-Orgogozo, 2017; Martin and Orgogozo, 2013; Stern and Orgogozo, 2009, 2008).  
130 It has been hypothesised that *cis*-regulatory mutations are more likely to contribute to  
131 evolutionary changes in morphology (Carroll, 2008). One reason for this is that *cis*-regulatory  
132 mutations are expected to have fewer pleiotropic effects when compared to coding mutations,  
133 mostly due to their highly modular nature conferring tissue specificity, affecting gene  
134 expression patterns without changing protein function. Conversely, protein coding sequences  
135 are less modular, and non-synonymous mutations are expected to affect protein function  
136 across every cell and tissue in which it is expressed. For the past three decades though, case  
137 studies have shown both types of mutations contributing to evolutionary change. Thus, trying  
138 to argue for the existence of a dichotomy in the relative frequency of both types of genetic  
139 change is too simplistic. Instead, we should strive to understand when one type of mutation is  
140 selected over the other (Stern and Orgogozo, 2008). For example, are different mutations  
141 associated with particular aspects of trait variation (e.g. colour versus pattern)? Do the cellular  
142 and developmental processes underlying a trait influence the nature of the mutations that can  
143 affect it? Do we see a shift in the role played by different types of mutation throughout  
144 evolutionary time?

145 Here, we tackled these questions by examining the relative distribution of *cis*-regulatory and  
146 coding mutations across vertebrate pigmentation evolution, and how the relative frequencies  
147 of these mutation types associate with other factors, such as loci mapping strategy, type of  
148 trait variation or types of genes involved. Moreover, by analysing the types of mutation  
149 associated with the evolution of vertebrate pigmentation, we identify trends in the field and  
150 discuss possible directions for future research.

## 151 Results

### 152 Genetic variants associated with pigmentation are asymmetrically distributed across 153 vertebrate clades

154 To examine the representation of different pigmentation systems across vertebrate  
155 evolutionary studies, we looked at the number of entries in Gephebase across five clades -  
156 teleost fishes, amphibians, squamates, birds and mammals. All of the 363 vertebrate  
157 pigmentation entries belonged to one of these clades. The significant majority (71.1%, n =  
158 258) of entries were mammals, whilst birds (20.9%, n = 76) were also highly prevalent (Table  
159 1). Teleosts (5.5%, n = 20) and squamates (2.2%, n = 8) were scarcely represented, and  
160 amphibians were associated with only one entry (0.3%). As such, clades in which multiple  
161 distinct chromatophore classes are found represent less than 10% of our dataset, in  
162 comparison to those clades which harbour only melanocytes and no other pigment cell  
163 classes. This taxonomic bias is attributable in part to how the field originated and evolved. For  
164 instance, the disproportionate representation of mammalian studies is likely a reflection of the  
165 extensive characterisation of the mouse coat colour genetics system, which has been studied  
166 for more than a century (Hoekstra, 2006). As a result, many of the key components of the  
167 melanin biosynthesis pathway were first identified in mice, and these components are often  
168 selected for investigation in other mammalian and bird systems.

169

170 **Table 1:** Number of entries in the vertebrate pigmentation Gephebase dataset in 2021 (see  
171 methods) according to vertebrate clade and taxonomic status. One entry corresponds to  
172 genetic variation at a given gene that has been found to contribute to pigmentation evolution  
173 in a given taxon.

| Gephebase entries         | Domesticated | Intraspecific | Interspecific | Total by clade |
|---------------------------|--------------|---------------|---------------|----------------|
| Teleosts                  | 2            | 10            | 8             | 20             |
| Amphibians                | 0            | 1             | 0             | 1              |
| Squamates                 | 0            | 8             | 0             | 8              |
| Birds                     | 54           | 18            | 4             | 76             |
| Mammals                   | 177          | 79            | 2             | 258            |
| Total by taxonomic status | 233          | 116           | 14            | 363            |

174

175 **Variation in vertebrate pigmentation is associated with a majority of coding mutations**

176 We examined the relative prevalence of protein coding and *cis*-regulatory mutations across  
177 the dataset. *Cis*-regulatory mutations, and coding sequence mutations together account for  
178 330 entries (90.9%) out of the full dataset, with coding mutations being the majority (262  
179 entries, 72.2%). The remaining classes of genetic variation (9.1%) were gene amplification,  
180 gene loss, intronic mutations, and unknown (when the gene has been identified but the exact  
181 mutation(s) have not) (Figure 2A). The overall prevalence of coding mutations is in contrast to  
182 the hypothesis that *cis*-regulatory mutations have a greater likelihood of generating phenotypic  
183 change (Carroll, 2008). This may reflect the relative ease of identifying coding mutations  
184 compared with *cis*-regulatory changes (Stern and Orgogozo, 2008). Next we analysed the  
185 relationship between the types of mutations and the methodology used to identify them.

186

### 187 **Study methodologies with less ascertainment bias exhibit slightly higher proportion** 188 **of *cis*-regulatory mutations**

189 Three methodology categories are represented in the dataset — *Candidate Gene*, *Linkage*  
190 *Mapping*, and *Association Mapping* (Courtier-Orgogozo et al., 2020). Candidate gene studies  
191 exhibit the highest ascertainment bias and may be expected to identify a higher proportion of  
192 coding mutations. Indeed, many candidate gene studies have historically focused on  
193 identifying amino-acid changes within coding regions in new species, based on previous  
194 findings in other species. However, they also facilitate comparisons across broad taxonomic  
195 distances compared with other mapping approaches. In contrast, both linkage and association  
196 mapping studies start with a phenotypic difference and attempt to pin it to a sequence change,  
197 at least as a locus interval. Linkage mapping involves crossing populations to generate  
198 recombinant hybrids, and thus can only map variation between closely related organisms  
199 which are interfertile. However, such studies are usually less biased than candidate gene  
200 approaches in their detection of causative loci, depending on the resolution and coverage of  
201 the mapping. Finally, association mapping approaches involve identification of significant  
202 association within large, heavily intermixed populations, and typically have minimal  
203 ascertainment bias as a result. To account for potential differences between methodologies  
204 we plotted the proportion of *cis*-regulatory mutations for each method (Figure 2B).

205 As expected, candidate gene approaches identified the lowest proportion of *cis*-regulatory  
206 mutations (12.2%) and was the only category below the dataset average. Linkage mapping  
207 had a higher proportion (23.8%), and association mapping was higher still (42.6%). All three  
208 of these methodology categories reported a higher overall proportion of coding than *cis*-  
209 regulatory mutations (Figure 2B). As such, regardless of the method used, protein coding  
210 mutations underlie the majority of the investigated vertebrate pigmentation variation. The



211 effect of study methodology on the *cis*-regulatory proportion appears to be that decreased  
212 ascertainment bias increases the discovery of causal *cis*-regulatory mutations.

213 These results have to be taken with caution, since all methodologies will tend to favour the  
214 identification of coding mutations. For example, once a candidate region is found by linkage  
215 mapping or association mapping, it is still easier to find coding mutations contributing to the  
216 trait of interest than *cis*-regulatory mutations: based on the genetic code it is easy to identify  
217 mutations disrupting the amino acid sequence of the encoded protein whereas it is difficult to  
218 predict *cis*-regulatory effects based on sequence alone. Furthermore, validation of *cis*-  
219 regulatory mutations usually requires reporter constructs and transgenic animals, thus being  
220 more time-consuming than the validation of coding mutations, which can often involve *in vitro*  
221 assays.

222

### 223 **Changes in *cis*-regulatory reporting over time do not fully explain the disparity in** 224 **mutation types**

225 The Gephebase dataset includes studies published between 1993 and 2020 (Courtier-  
226 Orgogozo et al., 2020). Owing to the increasing availability of genomic resources facilitating  
227 linkage and association mapping in a broader range of model systems (Kratochwil and Meyer,  
228 2015), we expected the *cis*-regulatory proportion of the dataset to increase over time. We  
229 therefore examined the cumulative number of *cis*-regulatory and coding mutations over the  
230 time period covered by the dataset, for each study methodology. We used this approach as  
231 the low numbers of entries for each individual year made non-cumulative comparison  
232 misleading – for instance, there were several years with no entries for a particular study  
233 methodology. We found that *cis*-regulatory entries began to appear in the dataset later than  
234 coding entries (Figure 2C and 2D). Prior to 2005 only a single *cis*-regulatory mutation was  
235 identified, compared with 65 coding. However, past this point *cis*-regulatory entries were  
236 added at approximately the same rate as coding, for each study methodology. Thus, although  
237 the overall *cis*-regulatory proportion does increase over the entire time period covered, this is  
238 largely due to coding mutation discovery beginning earlier.

239 We also did not observe an appreciable increase in the relative prevalence of linkage mapping  
240 or association mapping studies. Taken together, this suggests that the overall trend is a slight  
241 increase in *cis*-regulatory mutation reporting, but that differences in the relative prevalence of  
242 different study methodologies are not sufficient to explain the disparity between *cis*-regulatory  
243 and coding mutations. As such, it is possible that there is a discovery bias towards the  
244 identification of coding mutations in all methods, or alternatively, that evolutionary variations

245 in vertebrate pigmentation involve a higher proportion of coding mutations. In the next  
246 sections, we further examine this proposition with particular attention to research biases and  
247 phenotypic categories.

248

### 249 **The relative frequency of *cis*-regulatory and coding mutations holds in the absence of** 250 **the most represented genes in the dataset**

251 Historically, most evolutionary studies have centred on the melanic mammalian and bird  
252 pigmentation systems owing to the important knowledge in mice coat colour genetics.  
253 Therefore, we further explored if the prevalence of protein coding mutations was due to the  
254 overrepresentation of melanic pigmentation case studies. Mammal and avian melanic pigment  
255 patterns are the result of dynamic switching between the synthesis of two types of melanin.  
256 The switch between black eumelanin and reddish-brown pheomelanin is controlled by the  
257 melanocortin 1 receptor, MC1R (García-Borrón et al., 2005). *Mc1r* is the most represented  
258 gene in our dataset, with 87 entries that account for 26.4% of the dataset. The second-most  
259 represented gene in the dataset is *kit*, a cell-surface receptor that is essential for the  
260 expression of tyrosinase, a rate-limiting enzyme in melanin biosynthesis (Hou et al., 2000). 40  
261 *kit* entries account for 12.1% of entries. Finally, the third-most represented gene is agouti  
262 signalling protein, *asip*. ASIP acts as an antagonist to MC1R - in the absence of ASIP, MC1R  
263 initiates a signalling cascade resulting in eumelanin production, while ASIP antagonism reverts  
264 the melanocyte to pheomelanin synthesis (García-Borrón et al., 2005). There are 33 *asip*  
265 entries, corresponding to 10% of the dataset.

266 The high representation of these three genes in Gephebase reflects their relevance in  
267 mammalian and other vertebrate systems, and particularly their frequent selection as  
268 candidate genes for further study. To remove a potential bias of methodology resulting from a  
269 focus on melanic genes, we performed the same analysis with these three entries - *mc1r*, *kit*,  
270 and *asip* - removed. When removing *mc1r*, *kit*, and *asip* entries from the dataset, the overall  
271 proportion of *cis*-regulatory mutations increases from 20.6% to 27.6%, owing to the prevalence  
272 of coding mutations amongst *mc1r* entries in particular (Figure 2E). The *cis*-regulatory  
273 proportion of all three methodology categories increases, and association mapping remains the  
274 category with the highest *cis*-regulatory proportion, followed by linkage mapping (Figure 2E).  
275 Still, coding mutations remain the majority of entries for each type of experimental evidence.  
276 Taken together, the overrepresentation of these melanic case studies does not explain the  
277 higher prevalence of protein coding mutations in the vertebrate pigmentation dataset.

278

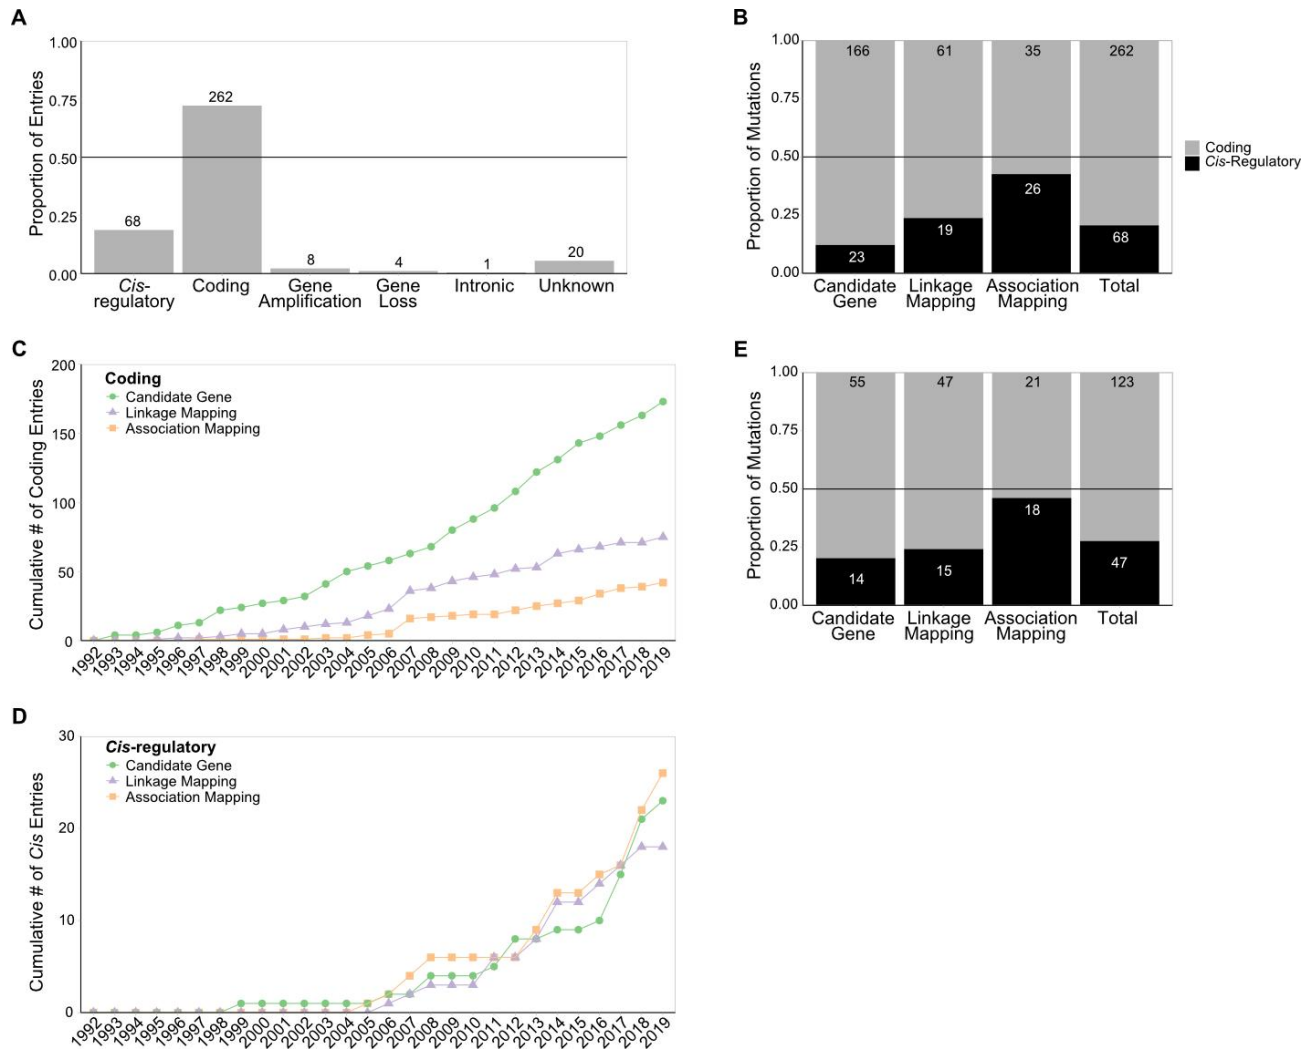

279

280

281 **Figure 2. A:** The relative proportions of all of the mutation types identified. **B:** The *cis*-  
 282 regulatory and coding mutations associated with each study methodology, as well as the total  
 283 proportion of the dataset. **C:** The cumulative number of coding mutations of each study  
 284 methodology over the time period recorded in the Gephebase dataset. **D:** The cumulative  
 285 number of *cis*-regulatory mutations of each study methodology over the time period recorded  
 286 in the Gephebase dataset. **E:** The *cis*-regulatory and coding mutations associated with each  
 287 study methodology, with *mc1r*, *asip* and *kit* entries removed. The numbers above (A) or within  
 288 (B & E) each bar represent the number of entries in that category. The grey horizontal line is  
 289 at 0.5.

290

291 **The proportion of coding mutations is higher for studies of domesticated and**  
 292 **intraspecific variation than for interspecific variation**

293 It has been previously hypothesised that different kinds of mutation occur with different  
294 frequencies during short-term and long term evolution with coding mutations being more  
295 common across short-term evolution, and thus shorter taxonomic distances (Stern and  
296 Orgogozo, 2009, 2008). Over shorter periods of time, mutations with deleterious pleiotropic  
297 effects might be selected for if alternative, less pleiotropic mutations do not immediately  
298 appear. Whereas, over long periods of time, non-optimal mutations will be tested in a variety  
299 of environments and there will be more opportunity for adaptive mutations without pleiotropic  
300 effects to appear and be selected for. In addition, contexts of artificial selection and favourable  
301 breeding conditions by humans can overcome the cost of mutations that would normally be  
302 counter-selected in the wild (Cieslak et al., 2011; Courtier-Orgogozo and Martin, 2020; Hanly  
303 et al., 2021). To test if the same is true for vertebrate pigmentation systems, we plotted the  
304 proportion of *cis*-regulatory mutations by taxonomic status. The dataset includes three  
305 categories of taxonomic status - *Domesticated*, *Intraspecific*, and *Interspecific*. Gephabase  
306 also includes '*Intergeneric or higher*', but no vertebrate colouration entries were assigned this  
307 category. The domesticated category included cases of artificial selection by breeders and  
308 fanciers, with pigment trait variations being directly selected in most cases. The intraspecific  
309 category contained studies that investigated natural phenotypic differences between morphs  
310 of the same species. Finally, interspecific entries were all those that used pairs of taxa above  
311 the species level.

312 Domesticated and intraspecific variation show a similarly low proportion of *cis*-regulatory  
313 mutations (16.6% and 23.1%, respectively; Figure 3A, Figure S1). In contrast, interspecific  
314 variation showed a notably higher proportion of *cis*-regulatory mutations (72.7%), suggesting  
315 that their prevalence may increase with increasing taxonomic distance (Figure 3A). This result  
316 has to be taken with caution as the number of studies addressing vertebrate pigmentation  
317 variation between species is extremely low – only a total of 11 entries were interspecific.  
318 Further, 6 out of these 11 case studies were teleost fish entries, which have multiple pigment  
319 cell types which could influence the mutation proportion (Figure S2). The low number of  
320 interspecific studies together with low clade diversity, limits the examination of trends across  
321 large evolutionary timescales and may reflect an underexplored aspect of vertebrate  
322 pigmentation evolution.

323

### 324 **The proportion of coding mutations is higher in mammal and bird studies than in** 325 **teleosts, amphibians, and squamates studies**

326 The prevalence of coding mutations could be associated with the disparity in representation  
327 of different vertebrate clades. Birds and in particular mammals constitute the significant

328 majority of entries (91.8%, n = 303 combined), with teleosts, amphibians, and squamates  
329 being much rarer (8.2%, n = 27 combined). These clades have divergent pigmentation  
330 systems, and notably only teleosts, amphibians, and squamates utilise multiple  
331 developmentally distinct classes of pigment cells. This may cause differences in evolutionary  
332 trends. For instance, the development of distinct pigment cell classes from a shared neural  
333 crest origin increases the likelihood of coding sequence mutations, in genes contributing to  
334 pigment cell development, having pleiotropic effects . Similarly, genes implicated in direct  
335 cellular interaction might be expected to suffer negative effects from coding sequence  
336 mutations, owing to the specificity of recognition that is typical of signalling molecules and their  
337 receptors. We therefore examined whether clades with distinct pigmentation systems lead to  
338 differences in the mutation proportion. For this purpose, we plotted the proportion of mutations  
339 by the five vertebrate clades (Table 1, Figure 3B). The only amphibian entry in the dataset  
340 was coding. Excluding amphibians, mammals had the lowest proportion of *cis*-regulatory  
341 changes (16.2%). Birds had a similarly low *cis*-regulatory proportion (21.7%). In contrast,  
342 squamates and teleosts both showed higher rates of *cis*-regulatory change - 50%, and 55.0%,  
343 respectively.

344 Although the low number of entries associated with multiple chromatophore pigment systems  
345 does preclude drawing definitive conclusions, this trend fits with the hypothesis that variation  
346 in pigmentation systems utilising multiple pigment cell classes exhibit a higher proportion of  
347 *cis*-regulatory mutations. Teleosts, amphibians, and squamates combined had a *cis*-  
348 regulatory proportions of 55.5%, compared with 17.5% for birds and mammals combined.  
349 Notably, teleosts exhibited a much higher proportion of interspecific studies than the dataset  
350 average - 6 of the 18 teleost entries were interspecific (Figure S2). The strong association  
351 between teleost entries and interspecific comparison makes it difficult to conclude which (if  
352 either) is the more important factor in yielding higher *cis*-regulatory proportions. Although,  
353 when taking into account only the intraspecific cases, the proportion of *cis*-regulatory  
354 mutations is still higher in teleosts, amphibians, and squamates (42.1%, 8 out of 19) than in  
355 birds and mammals (23.6%, 17 out of 72) (Figure S2). A larger sample of studies conducted  
356 in model systems harbouring multiple pigment cell classes, together with more interspecific  
357 studies in other clades, would provide valuable insight in this regard.

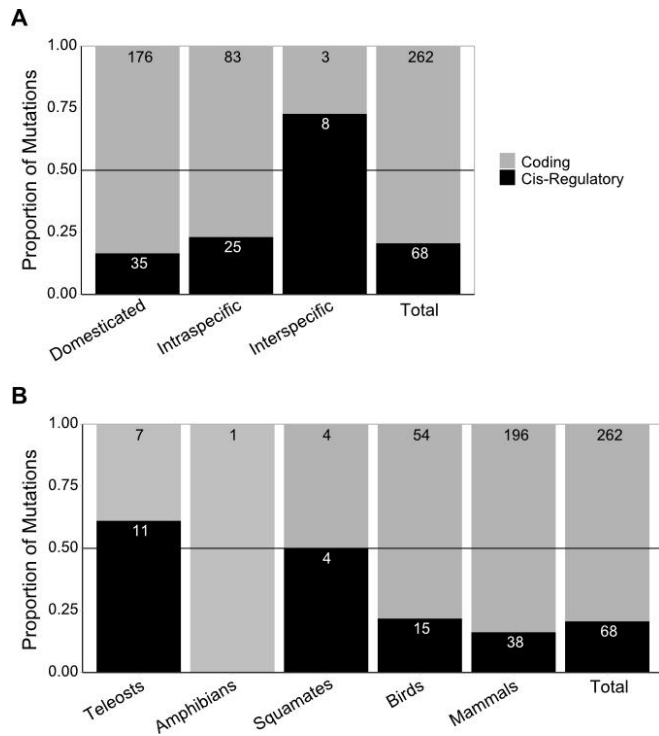

358

359

360 **Figure 3. A:** The proportion of *cis*-regulatory and coding mutations associated with each  
361 taxonomic status, as well as the total proportion for the dataset. **B:** The proportion of *cis*-  
362 regulatory and coding mutations associated with each clade. The numbers within each bar  
363 represent the number of entries in that category. The grey horizontal line is at 0.5.

364

### 365 **Types of phenotypic variation associated with coding versus *cis*-regulatory** 366 **mechanisms**

367 Differences in the nature of phenotypic variations may be associated with distinct types of  
368 genotypic change. For instance, loss of pigmentation may be more likely to result from loss-  
369 of-function coding sequence changes, whereas patterning changes could be preferentially  
370 driven by *cis*-regulatory mutations due to their high spatial modularity reducing pleiotropic  
371 effects (Orteu and Jiggins, 2020). To determine whether there are differences between colour  
372 loss, colour tuning, and pattern variation, we assigned different phenotype categories to each  
373 entry (Table 2).

374 Firstly, one of seven categories was assigned reflecting the nature of the phenotype in terms  
375 of the distribution of colour across the body - pheomelanism, eumelanism, dilution, amelanism,  
376 white spotting, carotenoid change, or carotenoid loss (Table 2). All of these categories  
377 encompassed melanic traits except for carotenoid change and loss. Each entry was assigned

378 to one of these categories on the basis of both the visible phenotype as well as the molecular  
 379 mechanism involved. For example, a phenotype involving patchy regions of white  
 380 pigmentation could be assigned to amelanism or white spotting, depending on whether  
 381 pigment synthesis or pigment cell migration was impaired.

382 Secondly, we separately assigned each entry to colour shift or pattern alteration, on the basis  
 383 of whether that phenotype represented a shift in colour or a change to spatial pattern  
 384 boundaries (Table 2).

385

386 **Table 2: Summary of phenotype categories:** assignment criteria for each phenotype  
 387 category, and the total number of entries in the dataset for which that category was assigned.

| Category Name                           | Criteria for Assignment                                                                                                                                                                                                                                                                        | Number of Entries | Example                                                                                                                                      |
|-----------------------------------------|------------------------------------------------------------------------------------------------------------------------------------------------------------------------------------------------------------------------------------------------------------------------------------------------|-------------------|----------------------------------------------------------------------------------------------------------------------------------------------|
| <b>Colour loss versus colour tuning</b> |                                                                                                                                                                                                                                                                                                |                   |                                                                                                                                              |
| Pheomelanism                            | A phenotype exhibiting increased abundance of pheomelanin relative to eumelanin, through changes to melanogenic switching or production of either melanin type. This includes phenotypes in which eumelanin synthesis is absent or reduced such that pheomelanin is relatively more prevalent. | 61                | A missense mutation in <i>MC1R</i> is associated with the red phenotype in domesticated donkeys (Abitbol et al., 2014).                      |
| Eumelanism                              | A phenotype exhibiting increased abundance of eumelanin relative to pheomelanin, through changes to melanogenic switching or production of either melanin type. This includes phenotypes in which pheomelanin synthesis is absent or reduced such that eumelanin is relatively more prevalent. | 71                | A loss-of-function SNP in <i>ASIP</i> is associated with 'black panther' phenotype melanistic leopards (Schneider et al., 2012).             |
| Dilution                                | A phenotype in which both eumelanin and pheomelanin synthesis is reduced (but not lost) across one or several tissues.                                                                                                                                                                         | 20                | A melanophilin splice site SNP leads to exon skipping and coat colour dilution in domesticated rabbits (Lehner et al., 2013).                |
| Amelanism                               | A phenotype characterised by a loss of melanin production across one or several tissues. Includes conditions variably defined as albinism and leucism.                                                                                                                                         | 42                | Three separate <i>tyrosinase</i> coding mutations are associated with oculocutaneous albinism in three species of frog (Miura et al., 2017). |

|                                               |                                                                                                                                                                                                                                                                                                                 |     |                                                                                                                                                                                                                                                                                      |
|-----------------------------------------------|-----------------------------------------------------------------------------------------------------------------------------------------------------------------------------------------------------------------------------------------------------------------------------------------------------------------|-----|--------------------------------------------------------------------------------------------------------------------------------------------------------------------------------------------------------------------------------------------------------------------------------------|
| Loss of carotenoid coloration                 | A phenotype resulting from the inability to uptake or process dietary carotenoids causing total loss of carotenoid-based pigmentation.                                                                                                                                                                          | 2   | A splice site mutation in <i>SCARB1</i> inhibits cellular carotenoid uptake, leading to a total loss of carotenoid pigmentation in white canaries (Toomey et al., 2017).                                                                                                             |
| Change in carotenoid coloration               | A phenotype resulting from changes to the relative or overall abundance of carotenoid-based pigments in the body.                                                                                                                                                                                               | 6   | Gain of expression of a carotenoid ketolase, <i>CYP2J19</i> , is responsible for processing yellow carotenoids to produce red ketocarotenoids in red canaries (Lopes et al., 2016).                                                                                                  |
| White spotting                                | A phenotype resulting from impairment of migration and/or differentiation of melanocytes or their precursors, causing patchy regions of white tissue. Differentiated from amelanism through molecular mechanism rather than visual appearance.                                                                  | 52  | White spotting phenotypes in domestic horses are associated with a large number of distinct mutations identified in <i>KIT</i> (Haase et al., 2015).                                                                                                                                 |
| <b>Colour shift versus pattern alteration</b> |                                                                                                                                                                                                                                                                                                                 |     |                                                                                                                                                                                                                                                                                      |
| Colour shift                                  | Any phenotype in which organismal colour shifts either locally or globally, without impacting the spatial boundaries of its existing patterning. Includes phenotypes in which an organism's existing pattern is overridden, e.g. whole body eumelanism.                                                         | 164 | In Japanese quail, a frameshift deletion in <i>ASIP</i> is associated with the recessive black phenotype, in which feather colour is darkened across the whole body without altering pattern boundaries (Hiragaki et al., 2008).                                                     |
| Pattern alteration                            | Any phenotype in which the spatial boundaries of an organism's colour pattern change, including the formation of new boundaries e.g. establishment of a pattern in a previously uniform region. Does not include phenotypes in which an existing pattern changes colour without change to the pattern boundary. | 99  | The convergent evolution of horizontal melanic stripes in different cichlid species is associated with regulatory changes in <i>agouti-related peptide 2</i> , and expression levels are predictive of stripe presence across multiple cichlid radiations (Kratochwil et al., 2018). |

388

389 In every category except changes in carotenoid pigmentation, coding sequence changes were  
 390 the most prevalent (Figure 4A). The categories with the lowest *cis*-regulatory proportion were  
 391 loss of carotenoid colouration (0%), and amelanism (4.8%). Although loss of carotenoid  
 392 colouration had too few entries (only 2) to draw definitive conclusions, it is notable that both



393 categories represent a loss of pigmentation. In contrast, the other five categories represent  
394 either changes in relative pigment quantity or impairment of cell migration. The prevalence of  
395 coding mutations amongst phenotypes involving pigment loss is largely due to loss-of-function  
396 mutations affecting genes vital for carotenoid processing or melanin biosynthesis,  
397 respectively. Thus, these results support the hypothesis that phenotypes involving changes to  
398 pigmentation quantity or distribution are associated with a higher proportion of *cis*-regulatory  
399 mutations than loss phenotypes.

400 Both phenotype categories pertaining to carotenoid colouration had relatively few entries - six  
401 for change in carotenoid colouration (all of which were *cis*-regulatory) and two for loss of  
402 carotenoid colouration. However, both categories combined did have a high *cis*-regulatory  
403 proportion (75.0%) suggesting that carotenoid pigmentation evolution may be more driven by  
404 *cis*-regulatory changes compared with melanic pigmentation. The overall *cis*-regulatory  
405 proportion for melanic pigmentation was 17.7%. Further studies investigating carotenoid  
406 phenotypes would be invaluable in determining whether carotenoid colouration does evolve  
407 through different mutation types.

408 For melanic pigmentation, the category with the highest *cis*-regulatory proportion was white  
409 spotting (26.9%), and this was the only melanin-related category with a higher proportion than  
410 the average. Amelanism (4.8%) had the lowest proportion, and the remaining categories -  
411 pheomelanism (16.4%), dilution (15.0%), and eumelanism (11.3%) were all similar to the  
412 average. Notably, two phenotype categories were strongly associated with domesticated  
413 entries - 18 out of 20 dilution entries, and all of the 52 white spotting entries, were identified in  
414 domesticated taxa (Figure S3). White spotting phenotypes are associated with highly  
415 pleiotropic effects, with many white spotting entries in Gephebase being deleterious in the  
416 homozygous state. It is therefore not surprising that white spotting mutations were only  
417 identified in domesticated taxa, where they can be subject to heterozygous advantage (Hanly  
418 et al., 2021; Hedrick, 2015). The slightly higher *cis*-regulatory proportion of this category may  
419 reflect the nature of white spotting phenotypes, which result from impairment of pigment cell  
420 migration or differentiation. It is therefore possible that coding mutations that would cause  
421 white spotting are more likely to be non-viable due to their pleiotropic effects on upstream  
422 cellular development.

423 Finally, phenotypes relating to changes in pigment pattern boundaries had a higher *cis*-  
424 regulatory proportion (29.3%) than phenotypes relating to colour shifts (10.4%). This was also  
425 true for every study methodology and taxonomic status (Figure S3 and S4). However, notably  
426 this difference between colour and pattern phenotypes was more pronounced in non-  
427 domesticated studies - for intraspecific and interspecific entries pattern phenotypes had a *cis*-

428 regulatory proportion of 60% compared with 14.3% for colour (Figure S3). This is in spite of  
429 white spotting phenotypes being exclusively domesticated as well as exclusively categorised  
430 as pattern alterations. Thus, the disparity between colour and pattern phenotypes in terms of  
431 mutation type may be larger than this dataset suggests in non-domesticated evolution,  
432 particularly given the overall prevalence of domesticated studies in pigmentation research.  
433 Overall the Gephebase dataset supports a disproportionate role of *cis*-regulatory changes in  
434 the generation of pattern variation (Orteu and Jiggins, 2020).

435

### 436 **Upstream developmental processes are associated with a higher proportion of *cis*-** 437 **regulatory mutations**

438 Differences in mutation proportions may also be associated with the developmental or cellular  
439 function fulfilled by the gene in question. We hypothesise that genes associated with upstream  
440 developmental processes would exhibit different proportions to those associated with  
441 downstream processes. For example, genes that play a role in cellular differentiation  
442 (upstream process) may be less tolerant of coding sequence mutation than genes contributing  
443 only to pigment deposition (downstream process). To test this, we assigned each gene to only  
444 one of six categories reflecting different cellular and/or developmental processes (Table 3).  
445 Three of these categories are cell type-specific functions such as melanosome formation,  
446 pigment biosynthesis and pigment trafficking/localisation. The remaining categories included  
447 more upstream functions such as pigment cell development, differentiation and cellular  
448 interactions (Table 3).

449 As predicted, the three categories representing more upstream cellular/developmental  
450 processes - pigment cell differentiation, pigment cell development and cellular interactions -  
451 were all associated with a higher proportion of *cis*-regulatory mutations than categories  
452 representing downstream cellular functions (Figure 4B). Only 2 entries fit the criteria for the  
453 cellular interactions category, both of which implicate *cis*-regulatory changes (Figure 4B). This  
454 small number of entries makes it difficult to determine whether differences in cellular  
455 interactions are associated with different mutation proportions - more data entries would be  
456 needed for conclusions to be drawn. Alternatively, the categories representing downstream  
457 processes - melanosome formation, pigment biosynthesis and pigment trafficking/localisation  
458 - all exhibited a higher proportion of protein coding mutations. The overall trend appears to fit  
459 the hypothesis that for upstream processes such as pigment cell lineage specification,  
460 mutations are more likely to be *cis*-regulatory when compared with downstream cellular  
461 processes which do not affect cell viability, such as variable rates of pigment deposition.

462

463 **Table 3: Summary of functional categories:** assignment criteria for each functional  
464 category, and the total number of entries in the dataset for which that category was assigned.  
465 Each gene was assigned to only one functional category.

| Category Name                      | Criteria for Assignment                                                                                               | Number of Unique Genes | Number of Entries |
|------------------------------------|-----------------------------------------------------------------------------------------------------------------------|------------------------|-------------------|
| Pigment cell differentiation       | Contributes to determining fate specification of pigment cell precursors                                              | 8                      | 15                |
| Pigment cell development           | Necessary for full development of pigment cells post-specification                                                    | 10                     | 24                |
| Cellular interactions              | Involved in signalling or other cellular interactions, either between or within pigment cell classes                  | 2                      | 2                 |
| Melanosome formation               | Contributes to the formation or maintenance of melanosomes, specialised melanin vesicles                              | 8                      | 46                |
| Pigment biosynthesis               | Role in directly synthesising or processing pigments or their direct precursors                                       | 25                     | 253               |
| Pigment trafficking / localisation | Role in inter- or intracellular localisation of pigments, whether as a direct transporter or as a trafficking protein | 4                      | 16                |

466

467

468 **DNA binding proteins are associated with a higher proportion of *cis*-regulatory**  
469 **mutations than other molecular functions**

470 We were also interested in whether the specific molecular activity of a gene would influence  
471 the distribution of mutation types. Coding mutations are constrained by the degree of  
472 functional conservation required by the protein's molecular function. Transcription factors  
473 implicated in multiple regulatory functions may be more constrained than enzymes that  
474 catalyse pigment-specific pathways, as even loss-of-function mutations may be tolerated in  
475 enzymes that are functionally specialised and non-essential (Pál et al., 2006). For example,  
476 differential expression of the transcription factor *sox10* resulting from *cis*-regulatory mutations  
477 underlies changes to melanogenesis in both pigeons and chickens (Domyan et al., 2014;  
478 Gunnarsson et al., 2011). *Sox10*, and other *sox* family transcription factors, are highly  
479 pleiotropic and essential for neural crest specification, migration and differentiation (Sarkar  
480 and Hochedlinger, 2013). No *sox10* coding mutations were identified in this dataset.  
481 Conversely, multiple presumptive null coding mutations have been identified in *mc1r*, including

482 one example of parallel evolution in cavefish. Thus, in contrast to *sox10* and other transcription  
483 factors, highly specialised proteins such as *mc1r* may be less susceptible to pleiotropy arising  
484 from null mutations. As such, we expected that molecular functions that are less pleiotropic  
485 would exhibit higher *cis*-regulatory proportions, and vice versa.

486 Using EBI's QuickGO mouse slimmer and manual combination of highly related molecular GO  
487 terms, we assigned each entry to one of 7 categories of GO molecular function (see Methods,  
488 Table S1, Figure S4A and S4B). We then examined the mutation proportions for each GO  
489 category (Figure 4C). DNA binding had the highest *cis*-regulatory proportion of any category  
490 (61.5%) and was the only category with a majority of *cis*-regulatory mutations. Signaling  
491 receptor binding had a higher than average *cis*-regulatory proportion of 42.9%, but conversely  
492 signaling receptor activity had the lowest with 6.0% . Protein binding also exhibited a higher  
493 than average *cis*-regulatory proportion (27.3%). Taken together, these results indicate that the  
494 ability of Transcription factors to evolve phenotypically-causal coding variants is limited by  
495 their pleiotropic roles in development, while their non-coding regions offer a more viable path  
496 for phenotypic changes.

497 An interesting result is that ligands ("signaling receptor binding") shows a higher *cis*-regulatory  
498 proportion than receptors ("signaling receptor activity"). For most signaling receptor genes, the  
499 corresponding ligand was also present in the dataset in the signaling receptor binding GO  
500 category. This includes *kit* and its ligand, as well as multiple endothelin signaling receptors  
501 and their respective ligands. Our results suggest that the coding sequence of genes encoding  
502 signaling ligands are more constrained than that of their signaling receptors. This supports  
503 previous findings that *cis*-regulatory mutations in ligand genes drive morphological evolution  
504 (Martin and Courtier-Orgogozo, 2017). The receptor/ligand pairing with the most entries in the  
505 dataset, *mc1r/asip*, supports this - *mc1r* has a *cis*-regulatory proportion of 1.1%, in contrast  
506 with its ligand *asip* with 39.4%. This trend is also observed when candidate gene studies are  
507 removed, with 5.5% of *cis*-regulatory mutations for *mc1r* and 50% of *cis*-regulatory changes  
508 for *asip*. A similar example, albeit with fewer entries, is *kit/kitlg*. *Kit* has a *cis*-regulatory  
509 proportion of 17.5% (7 out of 40, 23% if candidate gene studies are excluded), and multiple  
510 putative null mutations. Although *kitlg* has only four entries, all uncovered by linkage mapping  
511 or association mapping, three are *cis*-regulatory. Both the low number of *kitlg* entries and its  
512 relatively higher *cis*-regulatory proportion may indicate a lower evolutionary tolerance of  
513 coding mutations when compared with its receptor. Overall, our results indicate that ligands  
514 may be more vulnerable to pleiotropy than their corresponding receptors, or that ligand  
515 mutations preferentially drive localised pigmentation evolution compared with receptor  
516 mutations. It has been suggested that ligands play a specific role in altering spatially localised  
517 phenotypes due to the specificity of their expression patterns - in contrast to their

518 corresponding receptors, which are more likely to be ubiquitously expressed (Martin and  
519 Courtier-Orgogozo, 2017). Additionally, it may be expected that only the ligand-binding  
520 domains of receptor proteins are highly constrained by specificity, where other functional  
521 domains are more able to tolerate mutations (Worth et al., 2009). Taken together, both the  
522 modularity associated with ligand expression patterns as well as the greater number of  
523 mutation-tolerant domains in receptors may explain the higher *cis*-regulatory proportion in  
524 ligand encoding genes compared to receptor genes.

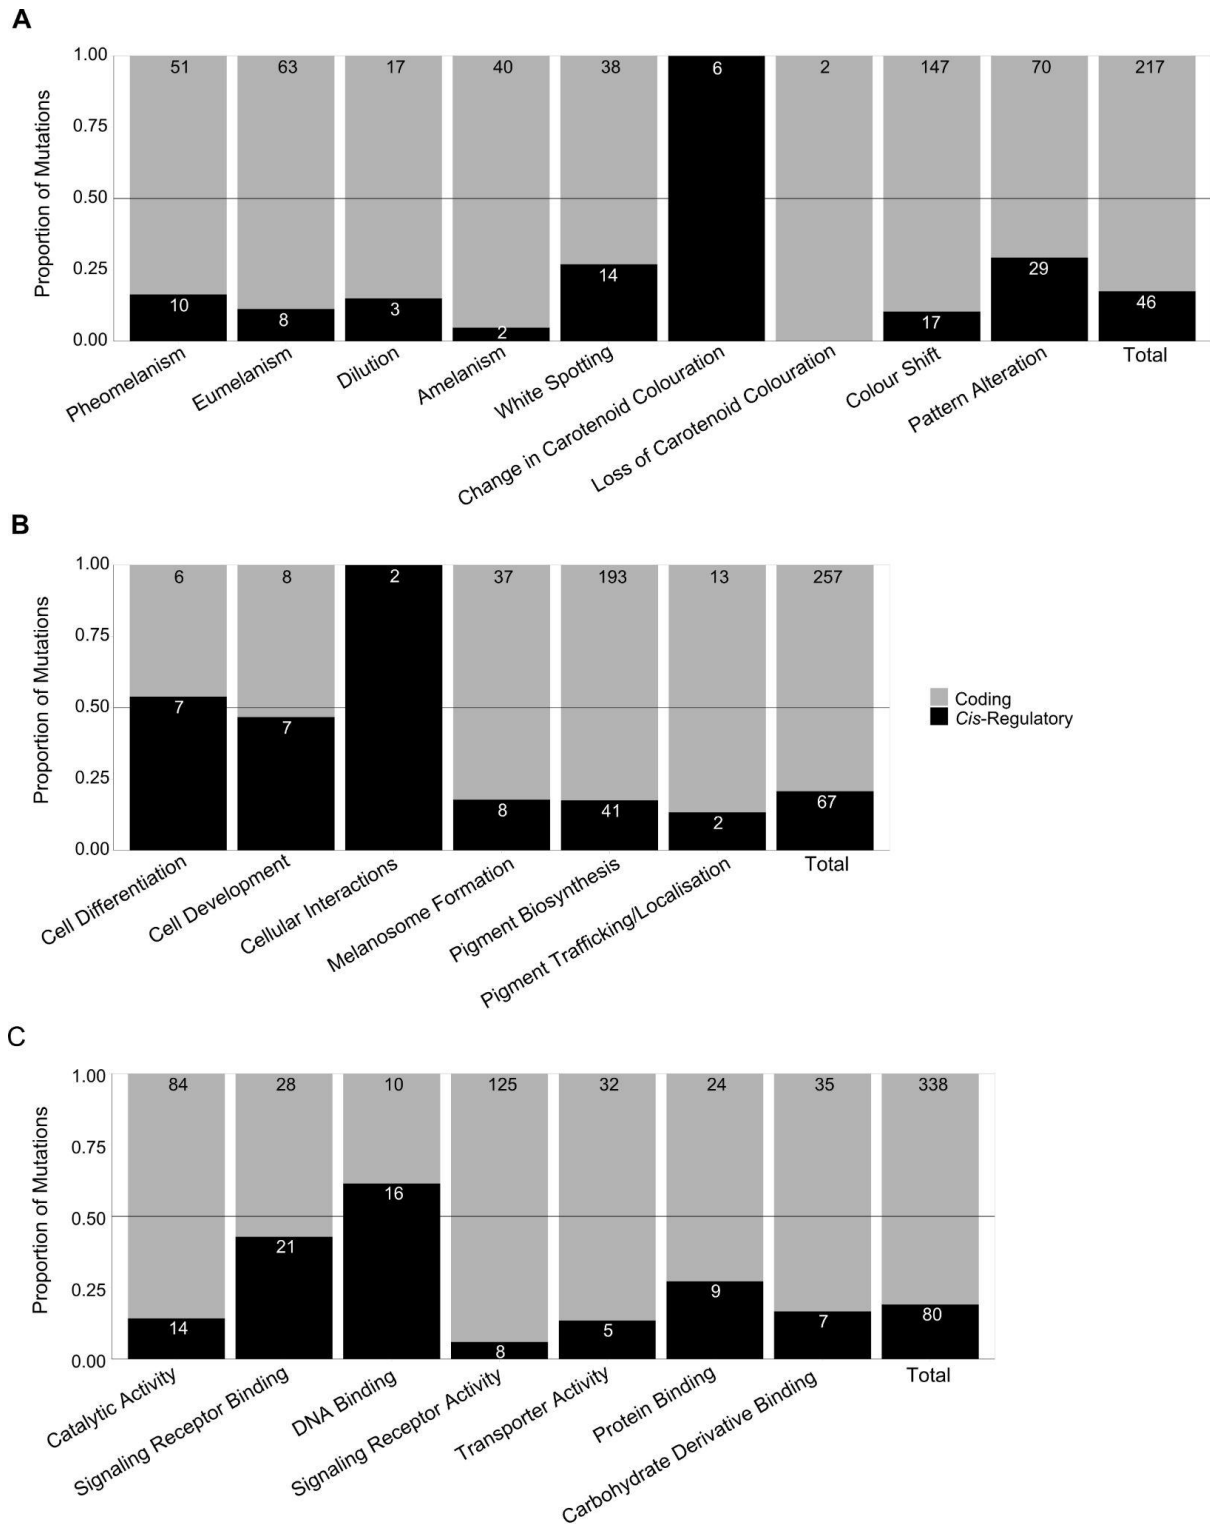

525

526 **Figure 4. A:** The proportion of *cis*-regulatory and coding mutations associated with each  
 527 phenotype category, as well as the total proportions of the dataset. Note that the total  
 528 proportions were for all entries that were assigned to either colour shift or pattern alteration.  
 529 **B:** The proportions of *cis*-regulatory and coding mutations associated with each cellular  
 530 function category. **C:** The proportion of *cis*-regulatory and coding mutations associated with

531 each parent gene ontology assignment. The numbers within each bar represent the number  
532 of entries in that category. The grey horizontal line is at 0.5.

533

### 534 **Divergent pigmentation systems have fewer shared evolutionary hotspots**

535 One of the major outcomes of the study of the genetic basis of evolutionary change is the  
536 discovery that the repeated co-option of the same genes underlies the evolution of convergent  
537 phenotypes. Genes that are repeatedly found as causal drivers of similar phenotypic changes  
538 in diverse taxa or populations have been referred to as genetic hotspots (Martin and  
539 Orgogozo, 2013). Here, we hypothesised that similar pigmentation systems would be more  
540 likely to evolve through re-use of the same set of genes, whereas more divergent pigmentation  
541 systems would have fewer shared evolutionary hotspots. We therefore divided the dataset by  
542 clade and compared the genes shared between each pairing of clades. The overlap between  
543 clades was calculated by combining the entries corresponding to each shared gene, and  
544 normalising by the total number of entries in the respective clade (see Methods).

545

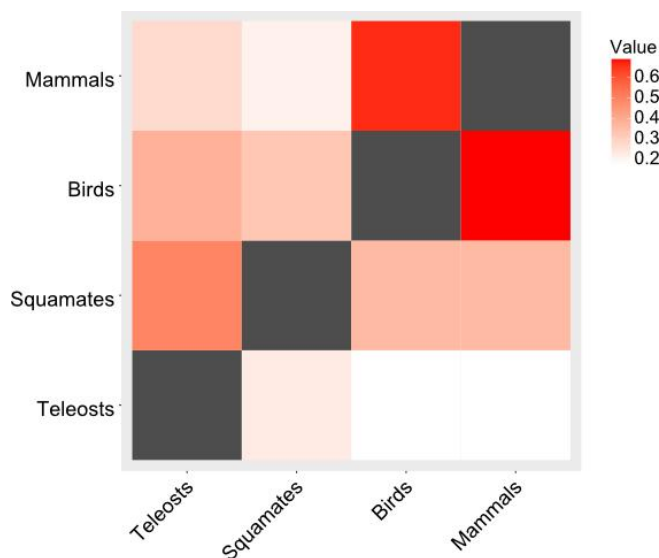

546

547 **Figure 5.** Heatmap of the normalised entries associated with genes shared between each  
548 clade pairing. For instance, the top left square has a value equal to the number of mammalian  
549 entries for genes that were also identified in teleost studies, divided by the total number of  
550 mammalian entries.

551

552 When comparing pigmentation systems with multiple pigment cell classes (teleosts and  
553 squamates) to those with only one (birds and mammals), each clade exhibited the greatest

554 hotspot overlap with the clade with which it shares a pigmentation system (Figure 5). The two  
555 largest normalised values were in mammalian entries for genes shared with birds, and in bird  
556 entries for genes shared with mammals. Likewise both teleosts and squamates had the  
557 greatest overlap with one another. Additionally, there was considerable overlap between  
558 squamates and birds which may reflect their phylogenetic relationship. As the number of  
559 shared hotspot genes would be expected to reduce over evolutionary time, phylogenetic  
560 distance is likely to contribute to the observed overlap between clades (Conte et al., 2012).

561 Although *mc1r* was highly represented in all clades, and thus contributed considerable hotspot  
562 overlap to all clade pairings, many other genes that were highly represented in the dataset  
563 were confined to mammals and birds only. The second, third, and fourth most represented  
564 genes in the overall dataset - *kit*, *asip*, and *tyrp1* - all had no teleost or squamate entries, and  
565 are all implicated in melanogenesis or melanogenic switching. However, certain melanogenic  
566 genes also exhibited overlap between teleost and squamate entries, such as *oca2*, a  
567 melanosomal transport protein (Table S2). *Oca2* comprised 15% (n = 3) of all teleost entries,  
568 and 12.5% (n = 1) of squamate entries - in contrast being rare in mammals (0.82%, n = 2) and  
569 absent entirely in birds. Only one non-melanic pigmentation gene was shared between birds  
570 and squamates. Aside from *mc1r*, no single gene was identified in all four clades.

571 Overall, the observed trend of higher hotspot overlap between the most similar pigmentation  
572 systems was as expected, and may indicate shared genetic mechanisms underlying pigment  
573 evolution in systems with or without multiple pigment cell classes. The low number of non-  
574 melanic pigmentation entries (only 22 in total) makes it difficult to draw conclusions about the  
575 relevance of hotspot genes outside of melanogenic pathways for clades with additional  
576 pigment types.



## 577 Discussion

578 Gephebase is a powerful tool that can be used to compile data on phenotype-genotype  
579 associations to infer general patterns regarding the mechanisms underlying evolutionary  
580 change. Importantly, this dataset can be used to find knowledge gaps in the current literature,  
581 and identify novel directions and study systems for future research. Here, we analysed a large  
582 dataset of 363 Gephebase entries, each a pair of alleles linked to phenotypic variation in  
583 vertebrate pigmentation. Of the three forms of empirical evidence accepted by Gephebase, it  
584 was clear that the study methodology with higher ascertainment bias - candidate gene  
585 approach - identified more coding sequence mutations than the other methods. Irrespective  
586 of this bias, protein coding changes were still the majority of mutations identified with linkage  
587 and association mapping. In addition, we did identify several factors that may affect the relative  
588 distribution of coding and *cis*-regulatory mutations. Below we discuss these factors and  
589 highlight new avenues of research in the vertebrate pigmentation field.

590

### 591 **Strong selection pressure might explain the higher proportion of coding mutations** 592 **associated with vertebrate pigmentation diversity**

593 We found that vertebrate pigmentation overall, and in domesticated species in particular, is  
594 associated with a majority of coding mutations. In the case of domesticated vertebrates, this  
595 may be explained by the strong selective pressure of the domestication process. During any  
596 form of artificial selection, desirable traits will be under strong directional selection, which can  
597 overcome the negative pleiotropic effects of coding mutations. Such an example is that of  
598 frame overo horses, where changes in patterning are a result of heterozygosity for a coding  
599 mutation in endothelin B receptor (*ednrb*), which leads to a white spotted pattern (Metallinos  
600 et al., 1998). Homozygosity for this mutation leads to lethal white foal syndrome - affected  
601 foals are completely white, and die shortly after birth. Selection for white spotted patterns in  
602 domestic horses has thus led to a lethal deleterious coding mutation becoming prevalent in  
603 the population, whereas in wild populations such a mutation would likely not have conferred  
604 sufficient advantage to overcome its negative pleiotropy.

605 A sufficiently strong selection pressure may likewise allow the emergence of pleiotropic coding  
606 mutations in wild populations. Gephebase contains examples that demonstrate how rapidly  
607 changes in pigmentation patterns may evolve when under such pressures, particularly in the  
608 context of retaining cryptic camouflage against a new or rapidly changing environment. For  
609 instance, populations of North American deer mice exhibit high gene flow, and thus low  
610 population structure, with the exception of the *agouti* locus. Strong selection for crypsis against

611 variable soil colouration instead leads to high variance in agouti coding sequence, and rapid  
612 divergence driven by colonisation over the last ~4000 years (Pfeifer et al., 2018). The  
613 prevalence of intraspecific coding mutations in our dataset may therefore be related to the  
614 strength of selection typical for vertebrate pigmentation evolution. In the future it would be  
615 interesting to investigate the effect of relative selection strength on the role of each mutation  
616 type, and to perform the same analyses in multiple morphological traits to determine if these  
617 trends are pigmentation specific.

618

### 619 **Evolutionary timescales and taxonomic distance**

620 We found that shorter taxonomic distances (domesticated and intraspecific entries) are  
621 associated with a higher proportion of protein coding changes than interspecific changes.  
622 These results should be taken with caution as the sparsity of interspecific studies indicates  
623 comparatively little investigation of pigmentation traits across larger evolutionary timescales.  
624 Interestingly, the majority (8 out of 14) of interspecific entries were identified in teleost species,  
625 despite their overall underrepresentation in the dataset. Further, 6 of these interspecific entries  
626 were found in East African cichlids. The current overrepresentation of shorter evolutionary  
627 timescales may introduce bias in the types of mutation that can be identified. Shorter  
628 evolutionary timescales may allow for pleiotropic mutations, as well as mutations that confer  
629 an advantage only in a specific environmental context. As such, the higher number of  
630 intraspecific and domesticated case studies is likely to result in overrepresentation of coding  
631 mutations. Expanding the timescales investigated in pigmentation evolution will facilitate  
632 testing of this hypothesis, and a greater understanding of how pigmentation changes over  
633 evolutionary time.

634 Identifying bird and mammal model systems for interspecific studies is challenging owing to  
635 the often-limited potential for hybridisation, restricting the types of mapping techniques  
636 available. For instance, the only two interspecific mammalian entries examined differences  
637 within the black rat species complex, and between the house mouse and tobacco mouse,  
638 respectively (Kambe et al., 2011; Robbins et al., 1993). Both of these studies used a candidate  
639 gene approach. In birds, Toews et al. used an association mapping approach to examine  
640 pigmentation evolution in two naturally hybridising species of warbler with highly divergent  
641 pigment patterns (Toews et al., 2016). Diversification of model systems may facilitate a greater  
642 understanding of long-term pigment evolution in birds and mammals especially.

643

644

## 645 **Potential biases introduced by study systems**

646 Mammalian and avian systems dominate the majority of the entries. These only possess  
647 melanocytes as pigment cells, and pigmentation differences primarily result from spatial and  
648 temporal differences in pigment production and deposition. In other vertebrates, pigmentation  
649 patterns result from the presence and differential arrangement of different classes of pigment  
650 cells that share a developmental origin. Those few studies in the Gephebase dataset that  
651 focus on clades with distinct chromatophore classes often found novel pigmentation  
652 phenotypes associated with a wider range of genes. This is also corroborated by the greater  
653 numbers of shared hotspot genes between clades with similar pigmentation systems - the  
654 genes identified in teleost and squamate studies showed little overlap with those found in  
655 mammals and birds. Studies in clades with distinct chromatophore classes also implicated  
656 more regulatory mutations than average. As current research continues to contribute new  
657 case studies, it will be interesting to look into whether this trend is borne out, or whether the  
658 higher prevalence of *cis*-regulatory mutations is an artefact of a low number of studies focusing  
659 on organisms with multiple pigment cell classes. In either case, greater emphasis on a broader  
660 set of model systems will benefit our broad understanding of vertebrate pigmentation  
661 evolution.

662 In particular it would be of interest to expand the number of studies in teleosts and reptiles to  
663 validate the hypothesis that pigmentation systems with multiple chromatophore classes evolve  
664 preferentially through *cis*-regulatory modifications. Similarly, amphibian pigmentation  
665 evolution was only represented by one study. Amphibians' highly permeable skin and lack of  
666 epidermal protection, as well as their commonly biphasic aquatic and terrestrial life cycles,  
667 may necessitate distinct adaptive functions for colouration compared with other vertebrate  
668 clades (Rudh and Qvarnström, 2013). These underrepresented clades will be highly  
669 informative, particularly with respect to interactions between chromatophore classes and  
670 pattern formation.

671

## 672 **The importance of understanding the cellular and developmental basis of variation**

673 We found that changes in patterning had a higher *cis*-regulatory proportion than changes in  
674 colour. This is consistent with previous hypotheses that *cis*-regulatory mutations largely  
675 govern spatial changes due to altering expression patterns (Carroll, 2008). For example, in  
676 sticklebacks a *cis*-regulatory allele of the *kit* ligand gene reduces its specific expression in gill  
677 tissue, leading to divergent gill pigmentation phenotypes (Miller et al., 2007). Gephebase

678 gathers several such examples, where mutations in widely expressed genes are *cis*-  
679 regulatory, so that only the expression in specific tissues is affected.

680 Nonetheless, the majority of pattern alteration case studies involve coding mutations. When  
681 looking more closely at some of these, we realised that many are in fact loss-of-function  
682 mutations in genes that are expressed only in specific regions of the body. For instance, the  
683 urucum breed of canary exhibits a red bill and legs, which are yellow in wild type canaries  
684 (Gazda et al., 2020). This is the result of a mutation that compromises the enzymatic activity  
685 of BCO2, an enzyme responsible for breakdown of full-length red carotenoids into shorter  
686 apocarotenoids. The specificity of this allele in affecting the bill and the legs is the result of  
687 loss-of-function mutations in a gene whose expression was already restricted to specific  
688 tissues.

689 Without knowing the expression patterns and the level of pleiotropy of a given gene, we may  
690 be wrongly categorising phenotypes as pattern alterations when in fact they are colour shifts.  
691 Unfortunately, we have no way of testing this, since most case studies focus solely on the  
692 genotype-phenotype association without conducting gene expression or developmental  
693 studies. Knowledge of a gene's specific function, together with its placement in a cellular and  
694 developmental context, is essential for an understanding of when and how certain genes and  
695 mutations are favoured over others.

696 Characterising trait development at the gene expression and cellular level is ever more  
697 important since we found different mutation proportions associated with differences in the  
698 upstream or downstream position of cellular and developmental processes. The genes  
699 contributing to upstream processes, i.e. those related to cellular differentiation and  
700 development, were more likely to be *cis*-regulatory compared with downstream processes. A  
701 previous study (Stern and Orgogozo 2008 Evolution, Table 3) distinguished two categories of  
702 genes, the ones that act at or near the terminal points of regulatory networks, named  
703 differentiation gene batteries, and the ones that are upstream in the gene network, and found  
704 that the proportion of *cis*-regulatory mutations was not significantly different for the two  
705 categories. This analysis was based on a compilation of 331 mutations for all types of traits  
706 across animals and plants. It is possible that this previous categorization was erroneous as it  
707 encompassed very diverse gene networks. Here, by focusing on vertebrate pigmentation, we  
708 performed a more robust assignment of the upstream versus downstream gene network  
709 position and uncovered an effect on the proportion of *cis*-regulatory mutations.

710 One of these studies identified a *cis*-regulatory mutation that altered the expression of colony  
711 stimulating factor 1 (*csf1*), a signalling factor expressed in xanthophores that is required for  
712 their differentiation and survival (Patterson et al., 2014). In *Danio albolineatus*, a close

713 relative of the zebrafish *D. rerio*, increased expression via a *cis*-regulatory mutation of *csf1a*  
714 was associated with early xanthophore recruitment (Patterson et al., 2014). The precocious  
715 xanthophore appearance led to changes in abundance and distribution of all three principal  
716 chromatophore classes (melanophores, xanthophores, and iridophores) which ultimately  
717 inhibited formation of the stripe pattern found in other *Danio* species. This study illustrates  
718 the potential complexity of phenotypes arising from mutations that affect cellular interactions.  
719 The relative lack of studies that have identified such mutations represents an exciting  
720 avenue for future pigmentation evolution research.

721 In contrast, coding mutations in more downstream categories would typically be expected to  
722 have lower impact on non-pigmentation phenotype. One study found that a loss-of-function  
723 mutation in scavenger receptor B1 (*SCARB1*) in canaries produces a completely white  
724 phenotype due to *SCARB1* being necessary for carotenoid uptake. As a result of *SCARB1*'s  
725 specialised role, this null coding mutation produces a spectacular pigmentation phenotype  
726 (Toomey et al., 2017). These results support the hypothesis that developmentally upstream  
727 genes may be constrained by pleiotropy. Given the overrepresentation of pigment synthesis  
728 case studies in the vertebrate pigmentation dataset, the collection of more data regarding  
729 other types of trait variation is imperative.

730

### 731 **What are the main knowledge gaps?**

732 Most of the vertebrate pigmentation entries (341 out of 363) result from the study of variation  
733 in melanic traits. In contrast, variation in other types of colour traits, such as carotenoids and  
734 pteridines, structural colouration, and colour plasticity remain largely unexplored. Further,  
735 most case studies address naturally selected traits with a relatively simple genetic basis – and  
736 only 20 out of 363 entries assessed variable sexually dimorphic traits. It would therefore be  
737 interesting to test if the same findings hold true for sexually selected traits or highly polygenic  
738 traits where each mutation has a small effect size.

739 The benefits of broadening the nature of the focal trait are manifold, but an obvious one is that  
740 by focusing on unexplored traits we may find previously uncharacterised genes underlying  
741 these traits. For example, the study of variation in yellow pigmentation in budgerigar parrots  
742 led to the identification of a coding mutation in a previously uncharacterised polyketide  
743 synthase that is involved in the synthesis of yellow polyene pigments called psittacofulvins  
744 (Cooke et al., 2017).

745 We found only one entry in the dataset relating to cellular structural colouration, an  
746 interspecific study investigating pigment pattern differences between two *Danio* fish species.

747 *D. nigrofasciatus* has a disrupted stripe pattern in comparison to *D. rerio*, which is associated  
748 with a *cis*-regulatory mutation in the *Endothelin-3* (*Edn3*) signaling peptide (Spiewak et al.,  
749 2018). *Edn3* promotes iridophore proliferation, this *cis*-mutation leads to decreased *Edn3*  
750 expression and correspondingly lower iridophore complement in *D. nigrofasciatus*. A lower  
751 number of iridophores secondarily affects melanophore proliferation, leading to a reduction of  
752 both cell types and disruption of the defined striped pattern in *D. nigrofasciatus*. This study  
753 being the only one in Gephebase relating to structural variation highlights that structural  
754 colouration is relatively unexplored, and represents an emerging field of research where new  
755 genes and developmental processes leading to variation in cells and physical structures will  
756 be identified.

757 The current entries in Gephebase are heavily focused on colouration traits that are genetically  
758 determined independently of environmental variables. Colour variation can also arise as a  
759 result of phenotypic plasticity, where the same genotype will generate different colour states  
760 under different conditions. Six entries pertained to plastic or seasonal colour changes – for  
761 instance, *cis*-regulatory alleles of *Asip* determine whether the winter coat of snowshoe hares  
762 is brown or white (Jones et al., 2018). Determining how plasticity emerges and evolves  
763 remains a challenge. Genes involved in plasticity evolution can only be identified when  
764 mapping differences between closely related species or populations which show variation in  
765 the presence and absence of plastic colouration (Gibert, 2017). Likewise variation in plastic  
766 colour responses can only be mapped by measuring variation in populational reaction norms,  
767 which are costly and time consuming experiments. Nonetheless, such studies will be key to  
768 discern between the two main hypotheses regarding the evolution of plasticity – whether  
769 evolutionary change occurs through changes in genes that sense and regulate a downstream  
770 response to external factors, or instead through changes in the colouration genes themselves  
771 that become responsive to environmental cues.

772 Sexually selected traits are also underrepresented in the database, making up only 5.5 % of  
773 the case studies. Understanding the interplay between natural and sexual selection on colour  
774 traits is important, since they may often act in opposite directions. For example, in several  
775 species of Lake Malawi cichlids a well camouflaged colour morph is associated with a *cis*-  
776 regulatory mutation in *pax7*. However, this mutation also has a deleterious effect in that it  
777 disrupts male nuptial colouration. This conflict has been resolved by the invasion of a novel  
778 sex determination locus in tight linkage with the *pax7* allele (Roberts et al., 2009). The  
779 importance of pigmentation patterns in mate choice can lead to such conflicts, and the ways  
780 in which they are resolved can present fascinating case studies. Sexually selected traits also  
781 present a conundrum in that it is unclear why and how trait variation is maintained in natural  
782 populations despite apparent directional selection due female choice or male-male

783 competition (Chenoweth and McGuigan, 2010). Identifying genes and genomic regions  
784 contributing to trait variation and studying its adaptive significance in wild populations creates  
785 the opportunity to understand this paradox (Johnston et al., 2013).

786 Finally, the Gephebase dataset is currently biased towards large-effect loci, as linkage  
787 mapping is limited in its statistical power to detect small effect mutations and polygenic  
788 architectures (Rockman, 2012; Slate, 2013). Association studies conducted on thousands of  
789 samples are now reaching a point where small-effect loci are detectable, under the conditions  
790 that these variants are common : for instance, several GWAS studies of skin pigmentation  
791 levels have uncovered an amino-acid polymorphism of *MFSD12* as a determinant of colour  
792 variation across several continents (Adhikari et al., 2019; Crawford et al., 2017; Feng et al.,  
793 2021; Lona-Durazo et al., 2019). This gene is now a candidate that is also showing association  
794 signals in domestic animal studies (Hédan et al., 2019; Tanaka et al., 2019), suggesting it is  
795 effectively a hotspot of pigment variation. While human GWAS studies are systematically  
796 curated and will undoubtedly lead to powerful meta-analyses (Buniello et al., 2019), and while  
797 infrastructure is being built to integrate these data with laboratory model systems (Shefchek  
798 et al., 2020), there is a lack of resources to compile data from evolutionary and bred gene-to-  
799 trait relationships beyond these organisms. Gephebase, OMIA, and Animal QTLdb (Courtier-  
800 Orgogozo et al., 2020; Hu et al., 2021; Lenffer et al., 2006) are stopgap attempts at curating  
801 these data, but would need long-term resources to keep pace in front of increased rates of  
802 discovery in the genomic age.

803

## 804 **Conclusion**

805 As more of the genetic variants underlying trait variation are identified, it becomes possible to  
806 more rigorously test predictions relating to the mechanisms of genetic evolution. Here, we  
807 highlight some of the trends in vertebrate pigmentation evolution, and specifically test some  
808 of the predictions made about the relative frequencies of *cis*-regulatory and coding mutations.  
809 In contrast to many people's expectations, we found that the majority of the documented  
810 variation in pigmentation is driven by coding sequence mutations. However, we also identified  
811 multiple factors associated with mutational proportion that partly explain this disparity. We  
812 therefore made suggestions for the future direction of vertebrate pigmentation research with  
813 respect to both systems and study design. As the number and variety of case studies  
814 continues to increase, we expect our understanding of the genetic, cellular and developmental  
815 mechanisms underlying the evolution of vertebrate pigmentation to expand.

## 816 **Methods**

### 817 **Literature curation in Gephebase**

818 Gephebase compiles pairs of alleles in association with pairs of phenotypic states (a genetic  
819 variation causing a phenotypic variation is called a “gephe” for brevity). A full description of  
820 the database is provided in (Courtier-Orgogozo et al., 2020). In short, data currently cover all  
821 eukaryotes with relevant publications, with a focus on traits of evolutionary rather than clinical  
822 relevance. This includes variations that have been artificially selected by breeders  
823 (“Domesticated” dataset), or subject to experimental evolution under lab-controlled selective  
824 pressures. Data is manually curated by a team of less than a dozen researchers, using  
825 keywords as well as Pubmed/Google Scholar citations to identify newly published studies.  
826 Our current triage system gives priority to gephes identified by forward genetics (QTL  
827 mapping, GWAS) with a single-gene resolution and reasonable supporting evidence for  
828 causality (if not for the variant, at least for the gene). Gephes identified by candidate gene  
829 approaches without mapping are also included when there is additional functional evidence  
830 for the causality of the mutation. Gephebase is up-to-date and gathers all relevant papers  
831 published until 2017. Past 2017, data curation efforts have mainly focused on colour variation  
832 in vertebrates (Gephebase “Trait” category = “Coloration”). The download of Gephebase data  
833 on 28 October 2021 (Supplementary File 1), which was used for the present study, can be  
834 considered as a compilation of the genes and mutations contributing to Vertebrate coloration  
835 up to and including 2019.

836

### 837 **Meta-analyses**

838 To examine trends in colour pattern evolution, we utilised Gephebase as a resource for  
839 exploring genotype-phenotype relationships. We formed a working dataset by selecting every  
840 Gephebase entry pertaining to the trait category ‘colouration’, and further filtered those entries  
841 by removing all entries pertaining to non-vertebrate species (accessed 28/10/2021). In total  
842 we retrieved 363 entries, with each entry representing a mutation at a single locus. Each  
843 mutation was present in only one gene for the organism in which it was identified, and there  
844 were a total of 61 unique genes identified across 89 vertebrate species. For each entry, we  
845 examined five parameters defined by Gephebase - Gene ID, Taxonomic Status, Study  
846 Methodology, Aberration Type, and Molecular Type (Courtier-Orgogozo et al., 2020). We  
847 further defined five additional parameters - Clade, Pigment Type, Phenotype Category,  
848 Functional Category, and Protein Category (Supplementary File 1).

849



## 850 **Assignment of new parameters**

851 *Clade*: Each vertebrate represented in the dataset unambiguously belonged to one of five  
852 clades with distinct pigmentation biology - amphibians, teleosts, squamates, birds and  
853 mammals. As such, we divided entries into these clades to compare trends in their different  
854 pigmentation systems.

855 *Pigment Type*: In total, five pigment types were represented in the dataset - biliverdin,  
856 carotenoids, pteridines, melanins, and psittacofulvins. Additionally, one entry referred to  
857 structural coloration. Each entry could be unambiguously assigned to one or more of these  
858 categories. In total there were 10 entries in which a single genetic variant was associated with  
859 changes to multiple pigments. These entries were assigned to each relevant pigment type  
860 category.

861 *Phenotype Category*: We empirically assigned to each entry one of seven phenotype  
862 categories in order to group similar organismal phenotypes, and analyse trends in how they  
863 arise. Each entry was considered independently, and assigned the category that best  
864 describes the organismal phenotype based on the original study (Table 2). We accounted for  
865 both the visible phenotype in terms of pigment distribution and quantity, as well as the  
866 molecular mechanisms underlying the phenotype. For example, amelanism was distinguished  
867 from white spotting on the basis of whether the phenotype resulted from a lack of melanin  
868 synthesis, or a failure of melanocyte migration/differentiation. Ambiguous cases were not  
869 assigned a category - a total of 87 entries. This left a total of 276 assignments, of which 254  
870 were *cis*-regulatory or coding. Additionally, categories were assigned relative to the ancestral  
871 state, so that for instance eumelanism refers to a mutation leading to an increase in eumelanin  
872 pigmentation.

873 We additionally assigned each category to either colour shift or pattern alteration, on the basis  
874 of whether the phenotype affected colour or spatial pattern boundaries. Each entry was  
875 considered independently, and these assignments were considered separately from the  
876 previous phenotype categories. Phenotypes involving a loss of patterning (for example whole  
877 body albinism resulting in no visible pattern boundaries) were considered colour shifts.  
878 Ambiguous entries were not assigned a category - a total of 76 entries. This left a total of 287  
879 assignments, of which 263 were *cis*-regulatory or coding. This total (263) was used for the  
880 'total' bars in Figures 4A, S3, and S4.

881 *Cellular Function Category*: In order to analyse genes associated with different developmental  
882 and cellular roles, we assigned each gene in the dataset a functional category, reflecting its  
883 role in the development of the phenotype (Supplementary File 1). Unlike phenotype

884 categories, these assignments were based on the gene rather than on individual entries.  
885 Entries were assigned empirically, based on literature review of the genes identified by each  
886 study, and the phenotypic function(s) they have been previously implicated in. As with  
887 phenotype categories, each gene was assigned with high certainty and little ambiguity.  
888 Additionally, a total of four genes, comprising seven entries, were removed for the purposes  
889 of this analysis, as their cellular functions with regard to pigmentation biology specifically were  
890 unclear. These were *cyp19a1*, *copa*, *EIF2S2*, and *Ivrn*. Each gene had one entry each, except  
891 for *Ivrn*, which had four entries.

892 *Molecular Function Category:* We assigned protein categories non-empirically by using the  
893 gene ontology (GO) terms associated with each gene in the dataset. We employed the EBI  
894 QuickGO Mouse Slimmer in order to identify parent GO terms associated with the sets of child  
895 terms associated with each gene. This slimmer was selected for being best representative of  
896 the distribution of GO terms within vertebrate clades. We then narrowed the set of GO terms  
897 to include only those associated with the 'Molecular Function' GO tree. We additionally  
898 manually combined a number of closely related GO terms in order to reduce the number of  
899 potential categories (Supplementary Table S1). In total there were 83 unique assignments of  
900 parent GO categories across the dataset. All of the 61 unique genes in the dataset generated  
901 at least one assignment, with the exception of *mlana*, a gene implicated in melanosome  
902 biogenesis. *Mlana* has only one molecular function assignment (GO:0005515 protein binding),  
903 which is not included in the QuickGO Mouse Slimmer. After combining closely related terms,  
904 there were 10 parent GO terms assigned. Then, we removed all categories with fewer than  
905 five unique gene assignments, of which there were three - RNA binding, enzyme regulator  
906 activity, and lipid binding. Thus we ended up with seven GO categories for comparison  
907 (Supplementary Table S1). The most commonly assigned GO category was the result of  
908 combining two GO terms - DNA binding and transcription factor activity. Although there are  
909 distinct biological differences between a gene displaying DNA binding activity and acting as a  
910 transcription factor, in the case of the Gephebase dataset there was nearly complete overlap  
911 between these terms. Only one gene was tagged as DNA binding without being tagged for  
912 transcription factor activity, namely *egfr* - epidermal growth factor receptor. All other genes  
913 were tagged with both GO terms, or neither.

914 *Evolutionary Hotspots:* We investigated the overlap of genes between pigmentation systems  
915 by examining the number of entries corresponding to shared genes. For each clade, we looked  
916 at all the genes identified in that clade, and then calculated the total number of entries  
917 corresponding to those genes in each of the other three clades. We then normalised each of  
918 these three figures by dividing by the total number of entries in that clade, in order to account  
919 for the disparity in entries between clades.

920 **Author contributions**

921 JE performed all data analysis. JE, MES, AM and VC contributed to the study design. MES,  
922 AM and VC contributed to the gephebase curation. JE and MES wrote the manuscript with  
923 contributions or feedback from all authors. All authors read and approved the final version of  
924 the manuscript.

925

926 **Additional information**

927 Supplementary File 1 contains the Gephebase dataset downloaded on 28 October 2021. It  
928 also contains information on parameter assignment (see methods) for each literature entry.  
929

930 **Acknowledgments**

931 We thank members of the Morphological Evolution Lab for discussion. AM and VC were  
932 supported by a John Templeton Foundation grant from 2014 to 2017 (JTF 43903). ES is  
933 supported by a NERC IRF NE/R01504X/1.

934

935 **Competing interests**

936 The authors declare no competing interests.

937

938 **Supplementary Figures**

939 **Figure S1**

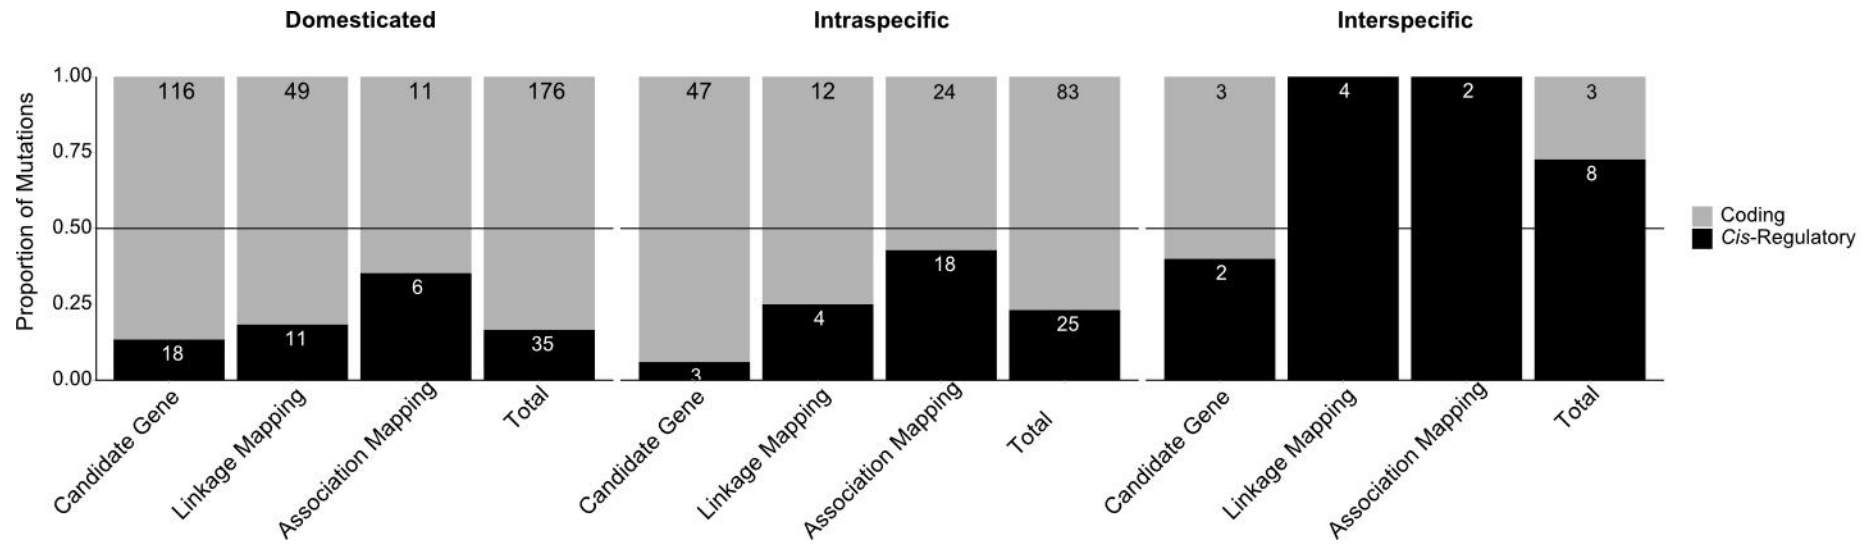

940

941

942 **Figure S1** shows the proportion of *cis*-regulatory and coding mutations associated with different taxonomic statuses - domesticated,  
 943 intraspecific and interspecific variation - controlling for study methodology, as well as the total proportion for each taxonomic status. The  
 944 numbers above each bar represent the number of entries in that category. The grey horizontal line is at 0.5.

945 **Figure S2**

946

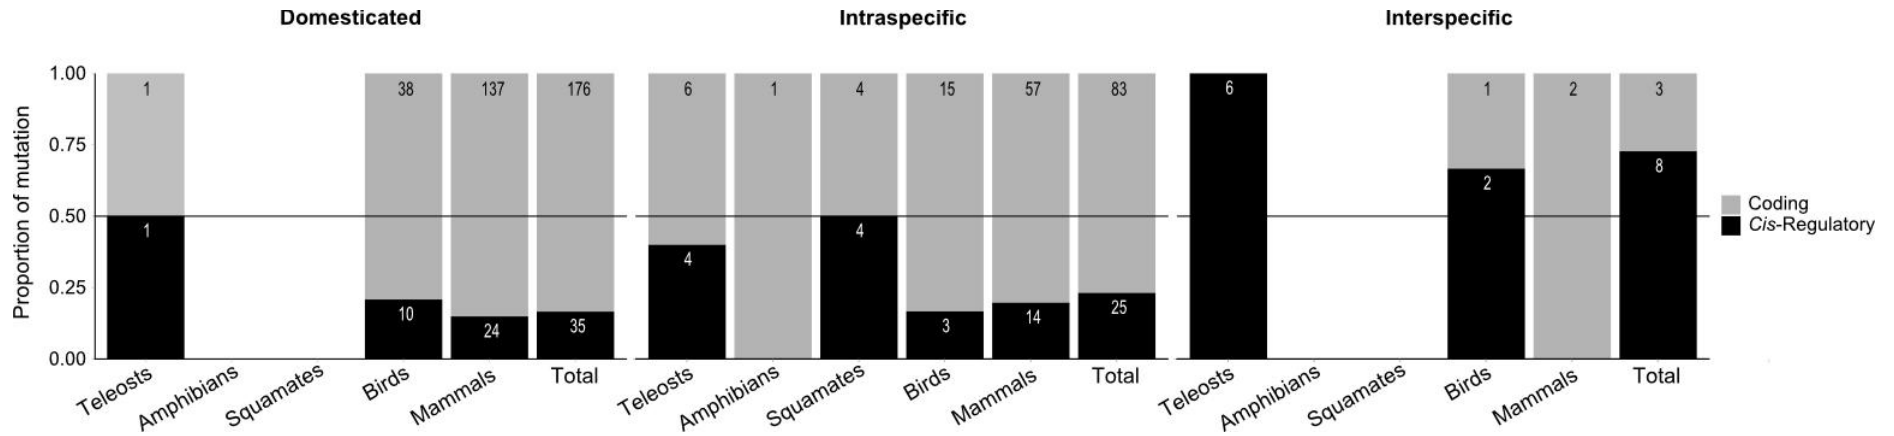

947

948

949 **Figure S2** shows the proportion of *cis*-regulatory and coding mutations associated with different taxonomic statuses and clade - **A**:  
950 Domesticated variation, **B**: Intraspecific variation, and **C**: Interspecific variation. The total proportion for each taxonomic status is shown. The  
951 numbers above each bar represent the number of entries in that category. The grey horizontal line is at 0.5.

952 **Figure S3**

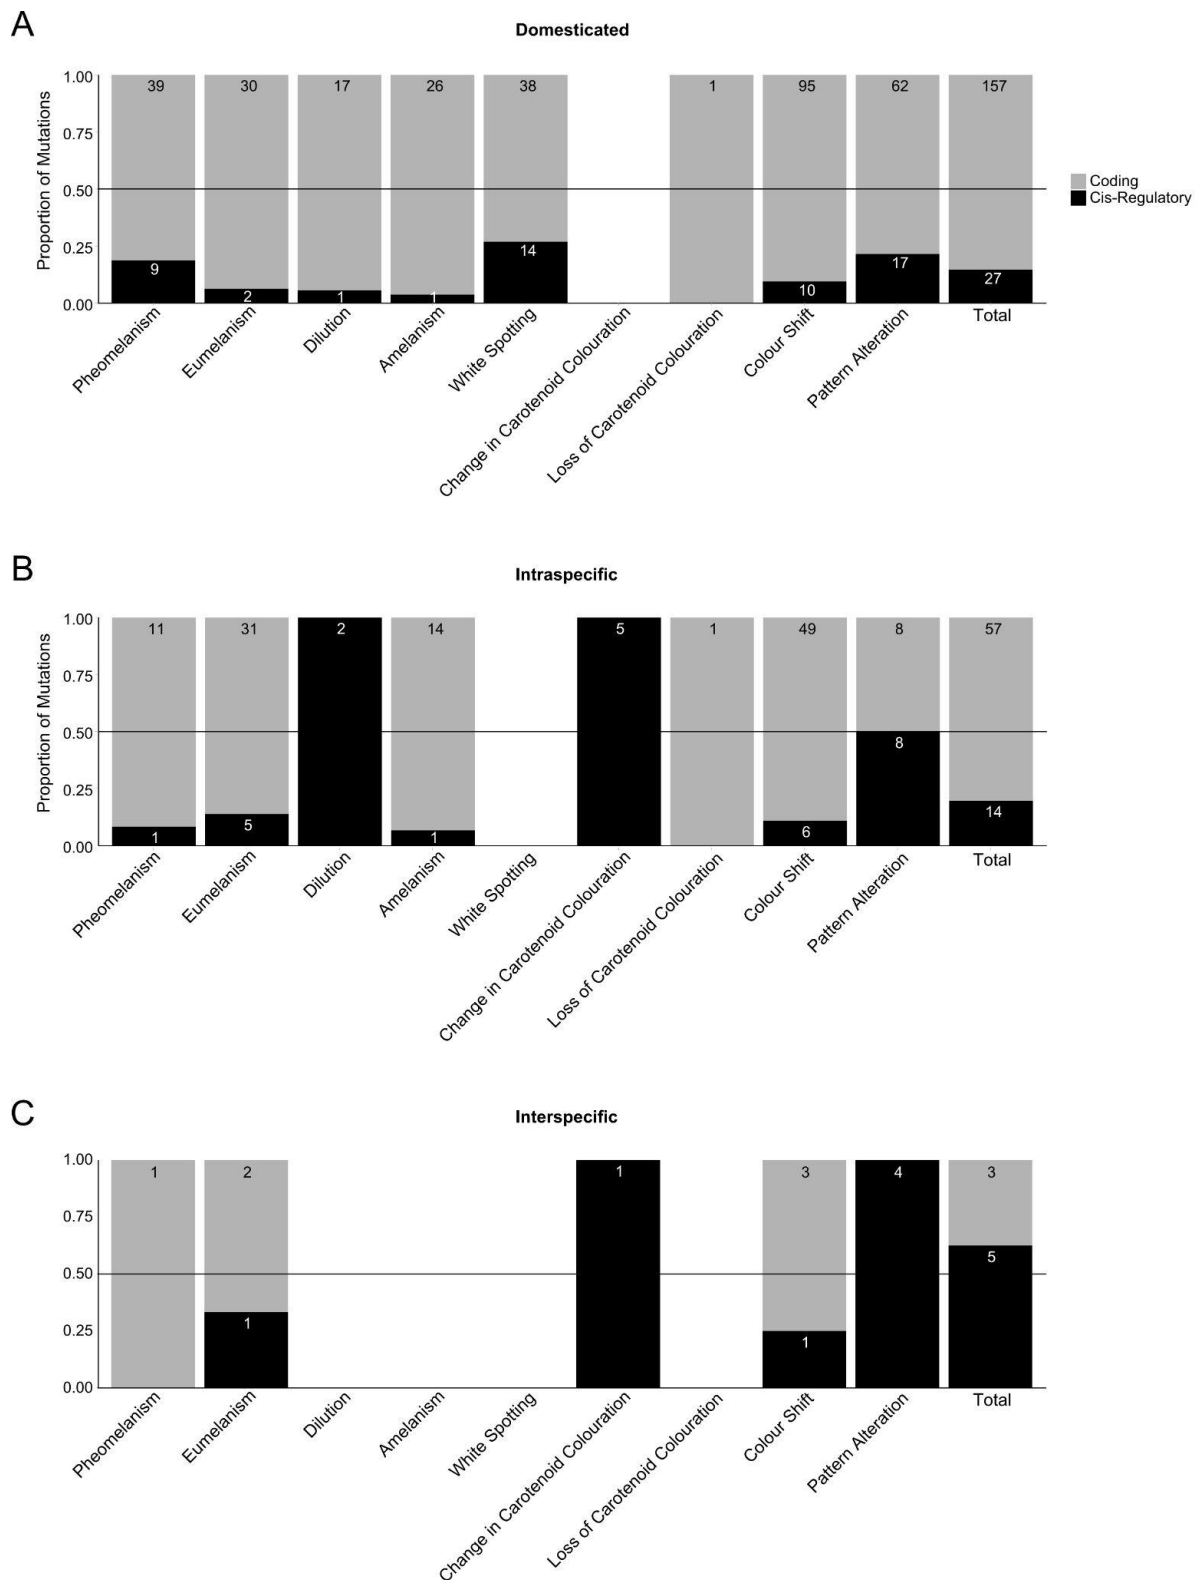

953

954 **Figure S3** shows the proportion of *cis*-regulatory and coding mutations associated with  
 955 different phenotype categories and taxonomic statuses - **A**: Domesticated variation, **B**:  
 956 Interspecific variation, and **C**: Interspecific variation. The total proportion for each taxonomic

957 status is shown. The numbers above each bar represent the number of entries in that  
958 category. The grey horizontal line is at 0.5.

959 **Figure S4**

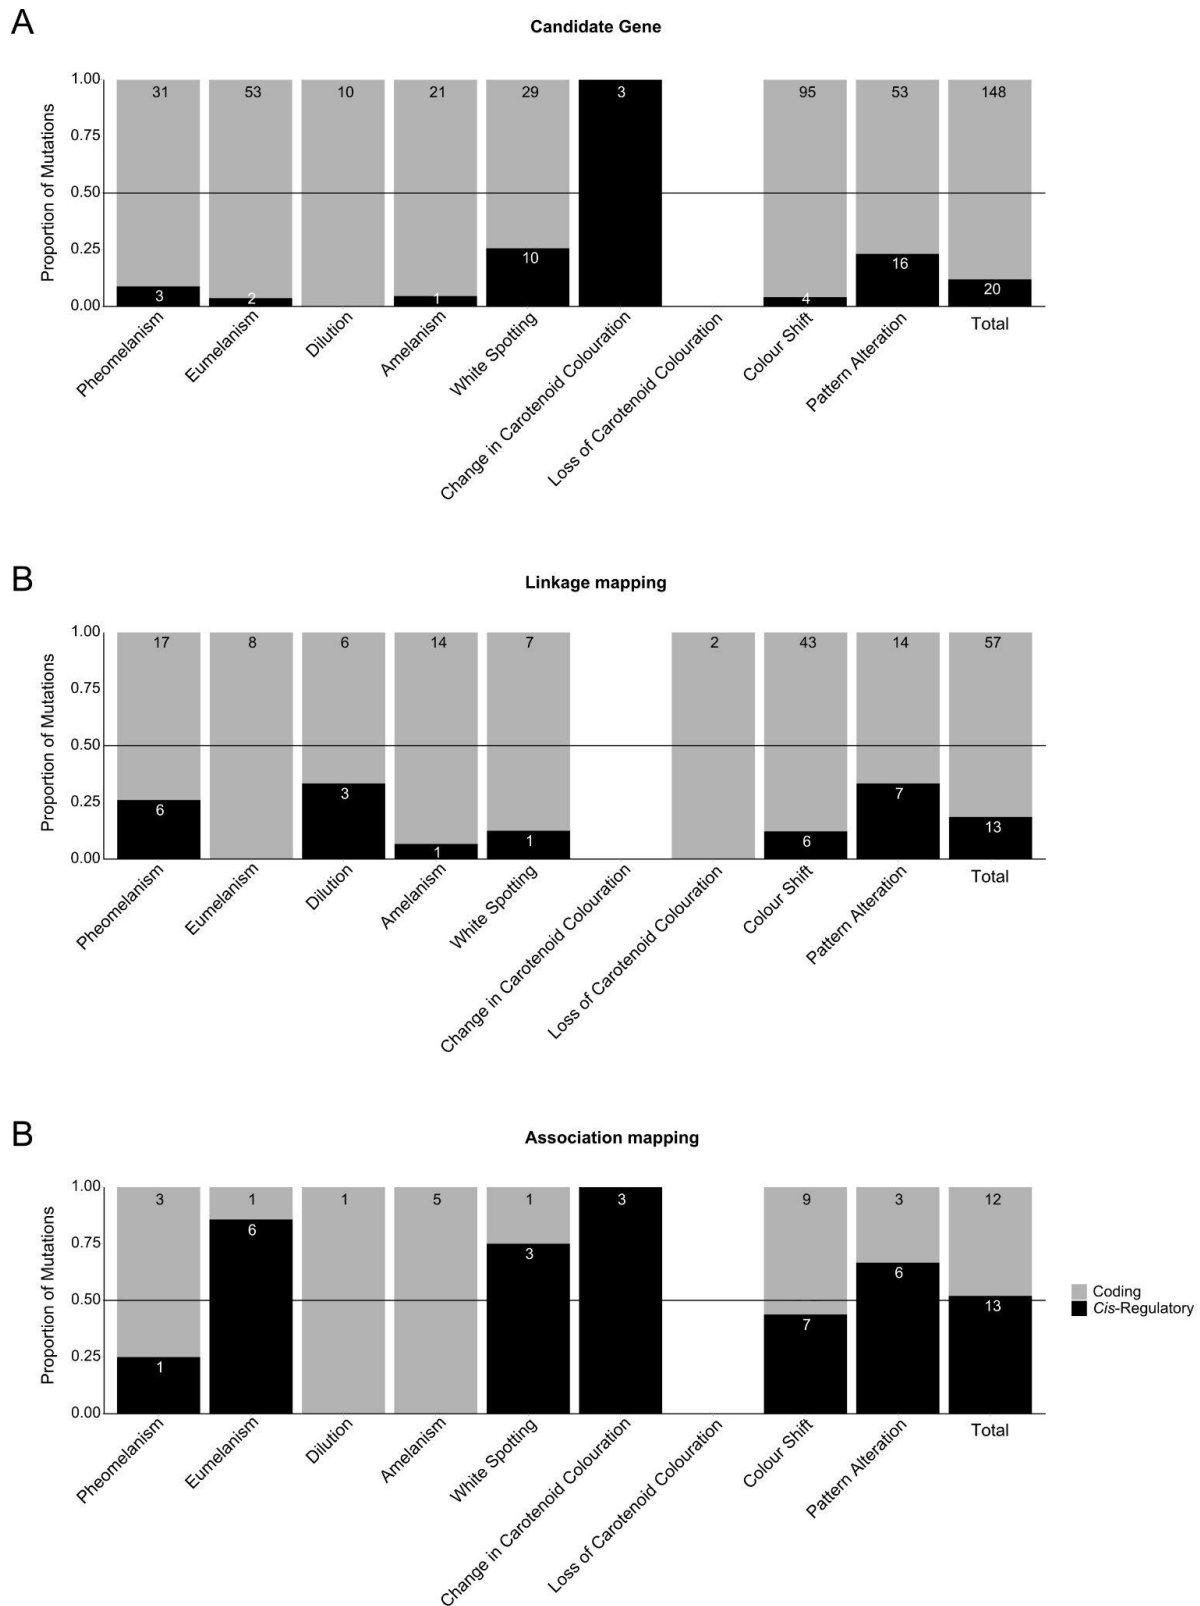

960

961 **Figure S4** shows the proportion of *cis*-regulatory and coding mutations associated with  
 962 different phenotype categories and study methodologies **A**: Candidate Gene, **B**: Linkage  
 963 Mapping, and **C**: Association Mapping. The total proportion for each study methodology is



964 shown. The numbers above each bar represent the number of entries in that category. The  
965 grey horizontal line is at 0.5.

966

967

968 **Supplementary Table S1** shows the 10 GO categories assigned to dataset entries, the total  
 969 number of genes to which each GO category was assigned and corresponding total number  
 970 of entries, the number of cis-regulatory entries to which each was assigned and  
 971 corresponding cis-regulatory proportion, and the child GO terms that were combined into the  
 972 category where relevant.

| Category Name                                | Unique Genes Assigned | Total Entries Assigned | Cis-Regulatory Entries | Cis-Regulatory Proportion | Child GO Categories                                                                         | GO Term ID                                              |
|----------------------------------------------|-----------------------|------------------------|------------------------|---------------------------|---------------------------------------------------------------------------------------------|---------------------------------------------------------|
| Catalytic Activity                           | 17                    | 110                    | 14                     | 0.149                     | Transferase Activity,<br>Oxidoreductase Activity,<br>Hydrolase Activity,<br>Ligase Activity | GO:0016740,<br>GO:0016491,<br>GO:0016787,<br>GO:0016874 |
| Signaling Receptor Binding                   | 14                    | 56                     | 21                     | 0.447                     | N/A                                                                                         | GO:0005102                                              |
| DNA Binding or Transcription Factor Activity | 11                    | 23                     | 16                     | 0.789                     | DNA Binding,<br>Transcription Factor Activity                                               | GO:0003677,<br>GO:0003700                               |
| Signaling Receptor Activity                  | 10                    | 147                    | 8                      | 0.060                     | N/A                                                                                         | GO:0038023                                              |
| Transporter Activity                         | 10                    | 39                     | 5                      | 0.135                     | N/A                                                                                         | GO:0005215                                              |
| Protein Binding                              | 7                     | 33                     | 9                      | 0.300                     | N/A                                                                                         | GO:0005515                                              |
| Carbohydrate Derivative Binding              | 6                     | 54                     | 7                      | 0.163                     | N/A                                                                                         | GO:0097367                                              |
| RNA Binding                                  | 3                     | 4                      | 2                      | 1                         | N/A                                                                                         | GO:0003723                                              |
| Enzyme Regulator Activity                    | 3                     | 3                      | 1                      | 0.500                     | N/A                                                                                         | GO:0030234                                              |
| Lipid Binding                                | 2                     | 2                      | 0                      | 0                         | N/A                                                                                         | GO:0008289                                              |
| <b>Totals</b>                                | <b>83</b>             | <b>471</b>             | <b>83</b>              | <b>0.216</b>              |                                                                                             |                                                         |

973

974 **Figure S5 - gene ontology assignments, unique genes and number of entries**

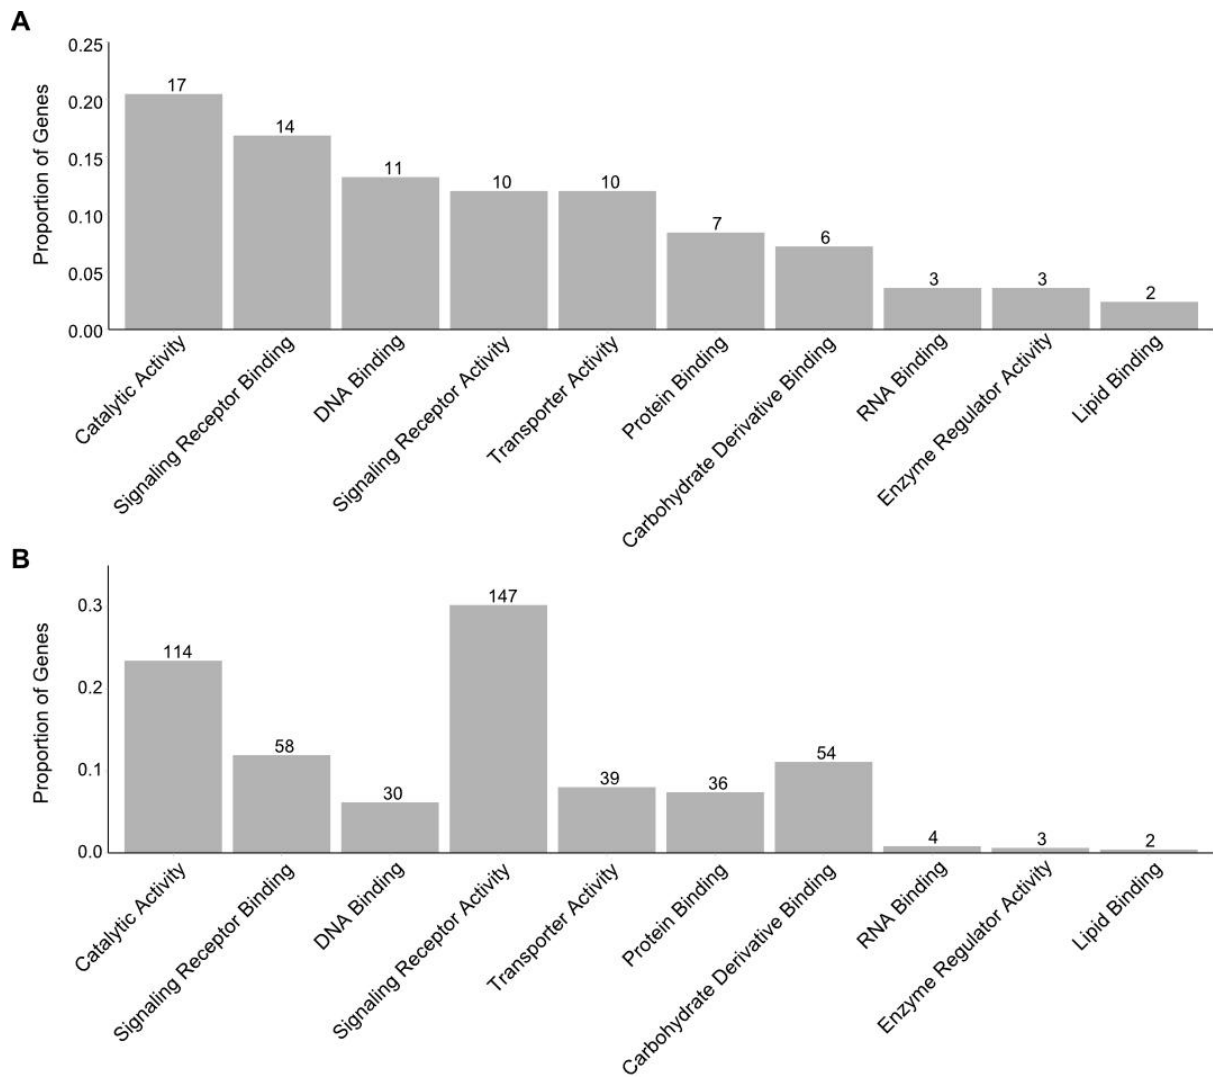

975

976 **Figure S5, A:** The proportion of unique genes that each GO category was assigned to. **B:**  
977 The proportion of entries that each GO category was assigned to. The numbers above each  
978 bar represent the number of genes or entries in that category. Note that the RNA Binding,  
979 Enzyme Regulatory Activity, and Lipid Binding categories were removed for Figure 4C in the  
980 main text due to their low numbers of assigned genes (see Methods).

981

982 **Supplementary Table S2** shows hotspot genes for each clade. For brevity, the 10 most  
 983 represented genes for each clade are displayed, excluding genes with equal numbers of  
 984 entries that would exceed this limit. For each gene, the number of entries in other clades is  
 985 shown. Full data is in the provided Supplementary File 1.

| Gene           | Number of Mammal Entries | Number of Bird Entries | Number of Teleost Entries | Number of Squamate Entries |
|----------------|--------------------------|------------------------|---------------------------|----------------------------|
| <b>Mammals</b> |                          |                        |                           |                            |
| MC1R           | 59                       | 24                     | 2                         | 3                          |
| Kit            | 49                       | 0                      | 0                         | 0                          |
| Asip           | 29                       | 6                      | 0                         | 0                          |
| Tyr            | 18                       | 7                      | 0                         | 0                          |
| Tyrp1          | 14                       | 2                      | 0                         | 0                          |
| SLC45A2        | 11                       | 6                      | 2                         | 0                          |
| PMEL           | 11                       | 3                      | 0                         | 0                          |
| Mlph           | 7                        | 2                      | 0                         | 0                          |
| <b>Birds</b>   |                          |                        |                           |                            |
| MC1R           | 59                       | 24                     | 2                         | 3                          |
| Tyr            | 18                       | 7                      | 0                         | 0                          |
| Asip           | 11                       | 6                      | 2                         | 0                          |
| SLC45A2        | 29                       | 6                      | 0                         | 0                          |

|                  |    |    |   |   |
|------------------|----|----|---|---|
| PMEL             | 11 | 3  | 0 | 0 |
| Ndp              | 0  | 3  | 0 | 0 |
| Sox10            | 0  | 3  | 0 | 0 |
| <b>Teleosts</b>  |    |    |   |   |
| Pax7             | 0  | 0  | 4 | 0 |
| Oca2             | 2  | 0  | 3 | 1 |
| MC1R             | 59 | 24 | 2 | 3 |
| SLC45A2          | 11 | 6  | 2 | 0 |
| <b>Squamates</b> |    |    |   |   |
| MC1R             | 59 | 24 | 2 | 3 |
| Oca2             | 2  | 0  | 3 | 1 |
| BCO2             | 0  | 2  | 0 | 1 |
| PREP             | 0  | 0  | 0 | 1 |
| Prkar1a          | 0  | 0  | 0 | 1 |
| Spr              | 0  | 0  | 0 | 1 |

## 987 References

- 988 Abitbol, M., Legrand, R., Tiret, L., 2014. A missense mutation in melanocortin 1 receptor is  
989 associated with the red coat colour in donkeys. *Anim. Genet.* 45, 878–880.  
990 <https://doi.org/10.1111/age.12207>
- 991 Adhikari, K., Mendoza-Revilla, J., Sohail, A., Fuentes-Guajardo, M., Lampert, J., Chacón-  
992 Duque, J.C., Hurtado, M., Villegas, V., Granja, V., Acuña-Alonzo, V., Jaramillo, C.,  
993 Arias, W., Lozano, R.B., Everardo, P., Gómez-Valdés, J., Villamil-Ramírez, H., Silva  
994 de Cerqueira, C.C., Hunemeier, T., Ramallo, V., Schuler-Faccini, L., Salzano, F.M.,  
995 Gonzalez-José, R., Bortolini, M.-C., Canizales-Quinteros, S., Gallo, C., Poletti, G.,  
996 Bedoya, G., Rothhammer, F., Tobin, D.J., Fumagalli, M., Balding, D., Ruiz-Linares,  
997 A., 2019. A GWAS in Latin Americans highlights the convergent evolution of lighter  
998 skin pigmentation in Eurasia. *Nat. Commun.* 10, 358. [https://doi.org/10.1038/s41467-  
999 018-08147-0](https://doi.org/10.1038/s41467-018-08147-0)
- 1000 Andrade, P., Pinho, C., Lanuza, G.P. i de, Afonso, S., Brejcha, J., Rubin, C.-J., Wallerman,  
1001 O., Pereira, P., Sabatino, S.J., Bellati, A., Pellitteri-Rosa, D., Bosakova, Z., Bunikis,  
1002 I., Carretero, M.A., Feiner, N., Marsik, P., Paupério, F., Salvi, D., Soler, L., While,  
1003 G.M., Uller, T., Font, E., Andersson, L., Carneiro, M., 2019. Regulatory changes in  
1004 pterin and carotenoid genes underlie balanced color polymorphisms in the wall lizard.  
1005 *Proc. Natl. Acad. Sci.* 116, 5633–5642. <https://doi.org/10.1073/pnas.1820320116>
- 1006 Barrett, R.D.H., Hoekstra, H.E., 2011. Molecular spandrels: tests of adaptation at the genetic  
1007 level. *Nat. Rev. Genet.* 12, 767–780. <https://doi.org/10.1038/nrg3015>
- 1008 Bedford, N.L., Hoekstra, H.E., 2015. *Peromyscus* mice as a model for studying natural  
1009 variation. *eLife* 4, e06813. <https://doi.org/10.7554/eLife.06813>
- 1010 Buniello, A., MacArthur, J.A.L., Cerezo, M., Harris, L.W., Hayhurst, J., Malangone, C.,  
1011 McMahon, A., Morales, J., Mountjoy, E., Sollis, E., Suveges, D., Vrousseau, O.,  
1012 Whetzel, P.L., Amode, R., Guillen, J.A., Riat, H.S., Trevanion, S.J., Hall, P., Junkins,  
1013 H., Flicek, P., Burdett, T., Hindorf, L.A., Cunningham, F., Parkinson, H., 2019. The  
1014 NHGRI-EBI GWAS Catalog of published genome-wide association studies, targeted  
1015 arrays and summary statistics 2019. *Nucleic Acids Res.* 47, D1005–D1012.  
1016 <https://doi.org/10.1093/nar/gky1120>
- 1017 Carroll, S.B., 2008. *Evo-Devo and an Expanding Evolutionary Synthesis: A Genetic Theory  
1018 of Morphological Evolution.* *Cell* 134, 25–36.  
1019 <https://doi.org/10.1016/j.cell.2008.06.030>
- 1020 Chenoweth, S.F., McGuigan, K., 2010. The Genetic Basis of Sexually Selected Variation.  
1021 *Annu. Rev. Ecol. Evol. Syst.* 41, 81–101. [https://doi.org/10.1146/annurev-ecolsys-  
1022 102209-144657](https://doi.org/10.1146/annurev-ecolsys-102209-144657)
- 1023 Cieslak, M., Reissmann, M., Hofreiter, M., Ludwig, A., 2011. Colours of domestication. *Biol.  
1024 Rev.* 86, 885–899. <https://doi.org/10.1111/j.1469-185X.2011.00177.x>
- 1025 Conte, G.L., Arnegard, M.E., Peichel, C.L., Schluter, D., 2012. The probability of genetic  
1026 parallelism and convergence in natural populations. *Proc. R. Soc. B Biol. Sci.* 279,  
1027 5039–5047. <https://doi.org/10.1098/rspb.2012.2146>
- 1028 Cooke, T.F., Fischer, C.R., Wu, P., Jiang, T.-X., Xie, K.T., Kuo, J., Doctorov, E., Zehnder, A.,  
1029 Khosla, C., Chuong, C.-M., Bustamante, C.D., 2017. Genetic Mapping and  
1030 Biochemical Basis of Yellow Feather Pigmentation in Budgerigars. *Cell* 171, 427-  
1031 439.e21. <https://doi.org/10.1016/j.cell.2017.08.016>
- 1032 Courtier-Orgogozo, V., Arnoult, L., Prigent, S.R., Wiltgen, S., Martin, A., 2020. Gephebase, a  
1033 database of genotype–phenotype relationships for natural and domesticated variation  
1034 in Eukaryotes. *Nucleic Acids Res.* 48, D696–D703.  
1035 <https://doi.org/10.1093/nar/gkz796>
- 1036 Courtier-Orgogozo, V., Martin, A., 2020. The coding loci of evolution and domestication:  
1037 current knowledge and implications for bio-inspired genome editing. *J. Exp. Biol.* 223,  
1038 jeb208934. <https://doi.org/10.1242/jeb.208934>
- 1039 Crawford, N.G., Kelly, D.E., Hansen, M.E.B., Beltrame, M.H., Fan, S., Bowman, S.L., Jewett,

- 1040 E., Ranciaro, A., Thompson, S., Lo, Y., Pfeifer, S.P., Jensen, J.D., Campbell, M.C.,  
1041 Beggs, W., Hormozdiari, F., Mpoloka, S.W., Mokone, G.G., Nyambo, T., Meskel,  
1042 D.W., Belay, G., Haut, J., NISC Comparative Sequencing Program, Rothschild, H.,  
1043 Zon, L., Zhou, Y., Kovacs, M.A., Xu, M., Zhang, T., Bishop, K., Sinclair, J., Rivas, C.,  
1044 Elliot, E., Choi, J., Li, S.A., Hicks, B., Burgess, S., Abnet, C., Watkins-Chow, D.E.,  
1045 Oceana, E., Song, Y.S., Eskin, E., Brown, K.M., Marks, M.S., Loftus, S.K., Pavan,  
1046 W.J., Yeager, M., Chanock, S., Tishkoff, S.A., 2017. Loci associated with skin  
1047 pigmentation identified in African populations. *Science* 358, eaan8433.  
1048 <https://doi.org/10.1126/science.aan8433>
- 1049 Cuthill, I.C., Allen, W.L., Arbuckle, K., Caspers, B., Chaplin, G., Hauber, M.E., Hill, G.E.,  
1050 Jablonski, N.G., Jiggins, C.D., Kelber, A., Mappes, J., Marshall, J., Merrill, R., Osorio,  
1051 D., Prum, R., Roberts, N.W., Roulin, A., Rowland, H.M., Sherratt, T.N., Skelhorn, J.,  
1052 Speed, M.P., Stevens, M., Stoddard, M.C., Stuart-Fox, D., Talas, L., Tibbetts, E.,  
1053 Caro, T., 2017. The biology of color. *Science* 357, eaan0221.  
1054 <https://doi.org/10.1126/science.aan0221>
- 1055 Domyan, E.T., Guernsey, M.W., Kronenberg, Z., Krishnan, S., Boissy, R.E., Vickrey, A.I.,  
1056 Rodgers, C., Cassidy, P., Leachman, S.A., Fondon, J.W., Yandell, M., Shapiro, M.D.,  
1057 2014. Epistatic and Combinatorial Effects of Pigmentary Gene Mutations in the  
1058 Domestic Pigeon. *Curr. Biol.* 24, 459–464. <https://doi.org/10.1016/j.cub.2014.01.020>
- 1059 Feng, Y., McQuillan, M.A., Tishkoff, S.A., 2021. Evolutionary genetics of skin pigmentation in  
1060 African populations. *Hum. Mol. Genet.* 30, R88–R97.  
1061 <https://doi.org/10.1093/hmg/ddab007>
- 1062 García-Borrón, J.C., Sánchez-Laorden, B.L., Jiménez-Cervantes, C., 2005. Melanocortin-1  
1063 receptor structure and functional regulation. *Pigment Cell Res.* 18, 393–410.  
1064 <https://doi.org/10.1111/j.1600-0749.2005.00278.x>
- 1065 Gazda, M.A., Toomey, M.B., Araújo, P.M., Lopes, R.J., Afonso, S., Myers, C.A., Serres, K.,  
1066 Kiser, P.D., Hill, G.E., Corbo, J.C., Carneiro, M., 2020. Genetic Basis of De Novo  
1067 Appearance of Carotenoid Ornamentation in Bare Parts of Canaries. *Mol. Biol. Evol.*  
1068 37, 1317–1328. <https://doi.org/10.1093/molbev/msaa006>
- 1069 Gibert, J.-M., 2017. The flexible stem hypothesis: evidence from genetic data. *Dev. Genes*  
1070 *Evol.* 227, 297–307. <https://doi.org/10.1007/s00427-017-0589-0>
- 1071 Goda, M., Fujii, R., 1995. Blue Chromatophores in Two Species of Callionymid Fish. *Zoolog.*  
1072 *Sci.* 12, 811–813. <https://doi.org/10.2108/zsj.12.811>
- 1073 Gunnarsson, U., Kerje, S., Bed'hom, B., Sahlqvist, A.-S., Ekwall, O., Tixier-Boichard, M.,  
1074 Kämpe, O., Andersson, L., 2011. The Dark brown plumage color in chickens is  
1075 caused by an 8.3-kb deletion upstream of SOX10. *Pigment Cell Melanoma Res.* 24,  
1076 268–274. <https://doi.org/10.1111/j.1755-148X.2011.00825.x>
- 1077 Haase, B., Jagannathan, V., Rieder, S., Leeb, T., 2015. A novel KIT variant in an Icelandic  
1078 horse with white-spotted coat colour. *Anim. Genet.* 46, 466–466.  
1079 <https://doi.org/10.1111/age.12313>
- 1080 Hanly, J.J., Livraghi, L., Heryanto, C., McMillan, W.O., Jiggins, C.D., Gilbert, L.E., Martin, A.,  
1081 2021. A macromutation eliminates colour patterning in captive butterflies. *bioRxiv*  
1082 <https://doi.org/10.1101/2021.10.29.466422>
- 1083 Hédan, B., Cadieu, E., Botharel, N., Dufaure de Citres, C., Letko, A., Rimbault, M.,  
1084 Drögemüller, C., Jagannathan, V., Derrien, T., Schmutz, S., Leeb, T., André, C.,  
1085 2019. Identification of a Missense Variant in MFSD12 Involved in Dilution of  
1086 Phaeomelanin Leading to White or Cream Coat Color in Dogs. *Genes* 10, 386.  
1087 <https://doi.org/10.3390/genes10050386>
- 1088 Hedrick, P., 2015. Heterozygote advantage: the effect of artificial selection in livestock and  
1089 pets. *J. Hered.* 106: 141-154. <https://doi.org/10.1093/jhered/esu070>
- 1090 Hiragaki, T., Inoue-Murayama, M., Miwa, M., Fujiwara, A., Mizutani, M., Minvielle, F., Ito, S.,  
1091 2008. Recessive black Is Allelic to the yellow Plumage Locus in Japanese Quail and  
1092 Associated With a Frameshift Deletion in the ASIP Gene. *Genetics* 178, 771–775.  
1093 <https://doi.org/10.1534/genetics.107.077040>
- 1094 Hoekstra, H.E., 2006. Genetics, development and evolution of adaptive pigmentation in

- 1095 vertebrates. *Heredity* 97, 222–234. <https://doi.org/10.1038/sj.hdy.6800861>
- 1096 Hoekstra, H.E., Coyne, J.A., 2007. The Locus of Evolution: Evo Devo and the Genetics of  
1097 Adaptation. *Evolution* 61, 995–1016. [https://doi.org/10.1111/j.1558-](https://doi.org/10.1111/j.1558-5646.2007.00105.x)  
1098 5646.2007.00105.x
- 1099 Hou, L., Panthier, J.J., Arnheiter, H., 2000. Signaling and transcriptional regulation in the  
1100 neural crest-derived melanocyte lineage: interactions between KIT and MITF. *Dev. Camb. Engl.* 127, 5379–5389. <https://doi.org/10.1242/dev.127.24.5379>
- 1101 Hu, Z.-L., Park, C.A., Reecy, J.M., 2021. Bringing the Animal QTLdb and CorrDB into the  
1102 future: meeting new challenges and providing updated services. *Nucleic Acids Res. gkab1116*. <https://doi.org/10.1093/nar/gkab1116>
- 1103  
1104 Huang, D., Lewis, V.M., Foster, T.N., Toomey, M.B., Corbo, J.C., Parichy, D.M., 2021. Development and genetics of red coloration in the zebrafish relative *Danio albolineatus*. *eLife* 10, e70253. <https://doi.org/10.7554/eLife.70253>
- 1105  
1106 Hubbard, J.K., Uy, J.A.C., Hauber, M.E., Hoekstra, H.E., Safran, R.J., 2010. Vertebrate pigmentation: from underlying genes to adaptive function. *Trends Genet.* 26, 231–  
1107 239. <https://doi.org/10.1016/j.tig.2010.02.002>
- 1108  
1109 Johnston, S.E., Gratten, J., Berenos, C., Pilkington, J.G., Clutton-Brock, T.H., Pemberton, J.M., Slate, J., 2013. Life history trade-offs at a single locus maintain sexually selected genetic variation. *Nature* 502, 93–95. <https://doi.org/10.1038/nature12489>
- 1110  
1111 Jones, M.R., Mills, L.S., Alves, P.C., Callahan, C.M., Alves, J.M., Lafferty, D.J.R., Jiggins, F.M., Jensen, J.D., Melo-Ferreira, J., Good, J.M., 2018. Adaptive introgression underlies polymorphic seasonal camouflage in snowshoe hares. *Science* 360, 1355–  
1112 1358. <https://doi.org/10.1126/science.aar5273>
- 1113  
1114 Kambe, Y., Tanikawa, T., Matsumoto, Y., Tomozawa, M., Aplin, K.P., Suzuki, H., 2011. Origin of agouti-melanistic polymorphism in Wild Black Rats (*Rattus rattus*) inferred from *Mc1r* gene sequences. *Zoolog. Sci.* 28, 560–567. <https://doi.org/10.2108/zsj.28.560>
- 1115  
1116  
1117 Kelsh, R.N., Harris, M.L., Colanesi, S., Erickson, C.A., 2009. Stripes and belly-spots - a review of pigment cell morphogenesis in vertebrates. *Semin. Cell Dev. Biol.* 20, 90–  
1118 104. <https://doi.org/10.1016/j.semcdb.2008.10.001>
- 1119  
1120 Kratochwil, C.F., Liang, Y., Gerwin, J., Woltering, J.M., Urban, S., Henning, F., Machado-Schiaffino, G., Hulsey, C.D., Meyer, A., 2018. Agouti-related peptide 2 facilitates convergent evolution of stripe patterns across cichlid fish radiations. *Science* 362, 457–460. <https://doi.org/10.1126/science.aao6809>
- 1121  
1122  
1123 Kratochwil, C.F., Meyer, A., 2015. Closing the genotype–phenotype gap: Emerging technologies for evolutionary genetics in ecological model vertebrate systems. *BioEssays* 37, 213–226. <https://doi.org/10.1002/bies.201400142>
- 1124  
1125  
1126  
1127  
1128 Kronforst, M.R., Barsh, G.S., Kopp, A., Mallet, J., Monteiro, A., Mullen, S.P., Protas, M., Rosenblum, E.B., Schneider, C.J., Hoekstra, H.E., 2012. Unraveling the thread of nature’s tapestry: the genetics of diversity and convergence in animal pigmentation. *Pigment Cell Melanoma Res.* 25, 411–433. [https://doi.org/10.1111/j.1755-](https://doi.org/10.1111/j.1755-148X.2012.01014.x)  
1129 148X.2012.01014.x
- 1130  
1131 Lapedriza, A., Petratou, K., Kelsh, R.N., 2014. Chapter 14 - Neural Crest Cells and Pigmentation, in: Trainor, P.A. (Ed.), *Neural Crest Cells*. Academic Press, Boston, pp. 287–311. <https://doi.org/10.1016/B978-0-12-401730-6.00015-6>
- 1132  
1133  
1134  
1135  
1136  
1137  
1138  
1139  
1140  
1141  
1142  
1143  
1144  
1145  
1146  
1147  
1148  
1149  
1149 Lehner, S., Gähle, M., Dierks, C., Stelter, R., Gerber, J., Brehm, R., Distl, O., 2013. Two-Exon Skipping within *MLPH* Is Associated with Coat Color Dilution in Rabbits. *PLOS ONE* 8, e84525. <https://doi.org/10.1371/journal.pone.0084525>
- 1143  
1144  
1145  
1146  
1147  
1148  
1149 Lenffer, J., Nicholas, F.W., Castle, K., Rao, A., Gregory, S., Poidinger, M., Mailman, M.D., Ranganathan, S., 2006. OMIA (Online Mendelian Inheritance in Animals): an enhanced platform and integration into the Entrez search interface at NCBI. *Nucleic Acids Res.* 34, D599–D601. <https://doi.org/10.1093/nar/gkj152>
- 1147  
1148  
1149 Lewis, V.M., Saunders, L.M., Larson, T.A., Bain, E.J., Sturiale, S.L., Gur, D., Chowdhury, S., Flynn, J.D., Allen, M.C., Deheyn, D.D., Lee, J.C., Simon, J.A., Lippincott-Schwartz, J., Raible, D.W., Parichy, D.M., 2019. Fate plasticity and reprogramming in



- 1150 genetically distinct populations of *Danio leucophores*. *Proc. Natl. Acad. Sci.* 116,  
1151 11806–11811. <https://doi.org/10.1073/pnas.1901021116>
- 1152 Lona-Durazo, F., Hernandez-Pacheco, N., Fan, S., Zhang, T., Choi, J., Kovacs, M.A., Loftus,  
1153 S.K., Le, P., Edwards, M., Fortes-Lima, C.A., Eng, C., Huntsman, S., Hu, D., Gómez-  
1154 Cabezas, E.J., Marín-Padrón, L.C., Grauholm, J., Mors, O., Burchard, E.G., Norton,  
1155 H.L., Pavan, W.J., Brown, K.M., Tishkoff, S., Pino-Yanes, M., Beleza, S., Marcheco-  
1156 Teruel, B., Parra, E.J., 2019. Meta-analysis of GWA studies provides new insights on  
1157 the genetic architecture of skin pigmentation in recently admixed populations. *BMC*  
1158 *Genet.* 20, 59. <https://doi.org/10.1186/s12863-019-0765-5>
- 1159 Lopes, R.J., Johnson, J.D., Toomey, M.B., Ferreira, M.S., Araujo, P.M., Melo-Ferreira, J.,  
1160 Andersson, L., Hill, G.E., Corbo, J.C., Carneiro, M., 2016. Genetic Basis for Red  
1161 Coloration in Birds. *Curr. Biol.* 26, 1427–1434.  
1162 <https://doi.org/10.1016/j.cub.2016.03.076>
- 1163 Martin, A., Courtier-Orgogozo, V., 2017. Morphological Evolution Repeatedly Caused by  
1164 Mutations in Signaling Ligand Genes, in: Sekimura, T., Nijhout, H.F. (Eds.), *Diversity*  
1165 *and Evolution of Butterfly Wing Patterns: An Integrative Approach*. Springer,  
1166 Singapore, pp. 59–87. [https://doi.org/10.1007/978-981-10-4956-9\\_4](https://doi.org/10.1007/978-981-10-4956-9_4)
- 1167 Martin, A., Orgogozo, V., 2013. The Loci of Repeated Evolution: A Catalog of Genetic  
1168 Hotspots of Phenotypic Variation. *Evolution* 67, 1235–1250.  
1169 <https://doi.org/10.1111/evo.12081>
- 1170 McNamara, M.E., Rossi, V., Slater, T.S., Rogers, C.S., Ducrest, A.-L., Dubey, S., Roulin, A.,  
1171 2021. Decoding the Evolution of Melanin in Vertebrates. *Trends Ecol. Evol.* 36, 430–  
1172 443. <https://doi.org/10.1016/j.tree.2020.12.012>
- 1173 Metallinos, D.L., Bowling, A.T., Rine, J., 1998. A missense mutation in the endothelin-B  
1174 receptor gene is associated with Lethal White Foal Syndrome: an equine version of  
1175 Hirschsprung Disease. *Mamm. Genome* 9, 426–431.  
1176 <https://doi.org/10.1007/s003359900790>
- 1177 Miller, C.T., Beleza, S., Pollen, A.A., Schluter, D., Kittles, R.A., Shriver, M.D., Kingsley, D.M.,  
1178 2007. cis-Regulatory Changes in Kit Ligand Expression and Parallel Evolution of  
1179 Pigmentation in Sticklebacks and Humans. *Cell* 131, 1179–1189.  
1180 <https://doi.org/10.1016/j.cell.2007.10.055>
- 1181 Miura, I., Tagami, M., Fujitani, T., Ogata, M., 2017. Spontaneous *tyrosinase* mutations  
1182 identified in albinos of three wild frog species. *Genes Genet. Syst.* 92, 189–196.  
1183 <https://doi.org/10.1266/ggs.16-00061>
- 1184 Orteu, A., Jiggins, C.D., 2020. The genomics of coloration provides insights into adaptive  
1185 evolution. *Nat. Rev. Genet.* 21, 461–475. <https://doi.org/10.1038/s41576-020-0234-z>
- 1186 Pál, C., Papp, B., Lercher, M.J., 2006. An integrated view of protein evolution. *Nat. Rev.*  
1187 *Genet.* 7, 337–348. <https://doi.org/10.1038/nrg1838>
- 1188 Parichy, D.M., 2021. Evolution of pigment cells and patterns: recent insights from teleost  
1189 fishes. *Curr. Opin. Genet. Dev.* 69, 88–96. <https://doi.org/10.1016/j.gde.2021.02.006>
- 1190 Patterson, L.B., Bain, E.J., Parichy, D.M., 2014. Pigment cell interactions and differential  
1191 xanthophore recruitment underlying zebrafish stripe reiteration and *Danio* pattern  
1192 evolution. *Nat. Commun.* 5, 5299. <https://doi.org/10.1038/ncomms6299>
- 1193 Pfeifer, S.P., Laurent, S., Sousa, V.C., Linnen, C.R., Foll, M., Excoffier, L., Hoekstra, H.E.,  
1194 Jensen, J.D., 2018. The Evolutionary History of Nebraska Deer Mice: Local  
1195 Adaptation in the Face of Strong Gene Flow. *Mol. Biol. Evol.* 35, 792–806.  
1196 <https://doi.org/10.1093/molbev/msy004>
- 1197 Protas, M.E., Patel, N.H., 2008. Evolution of Coloration Patterns. *Annu. Rev. Cell Dev. Biol.*  
1198 24, 425–446. <https://doi.org/10.1146/annurev.cellbio.24.110707.175302>
- 1199 Robbins, L.S., Nadeau, J.H., Johnson, K.R., Kelly, M.A., Roselli-Rehfuß, L., Baack, E.,  
1200 Mountjoy, K.G., Cone, R.D., 1993. Pigmentation phenotypes of variant extension  
1201 locus alleles result from point mutations that alter MSH receptor function. *Cell* 72,  
1202 827–834. [https://doi.org/10.1016/0092-8674\(93\)90572-8](https://doi.org/10.1016/0092-8674(93)90572-8)
- 1203 Roberts, R.B., Ser, J.R., Kocher, T.D., 2009. Sexual Conflict Resolved by Invasion of a  
1204 Novel Sex Determiner in Lake Malawi Cichlid Fishes. *Science* 326, 998–1001.

- 1205 <https://doi.org/10.1126/science.1174705>
- 1206 Rockman, M.V., 2012. The Qtn Program and the Alleles That Matter for Evolution: All That's
- 1207 Gold Does Not Glitter. *Evolution* 66, 1–17. <https://doi.org/10.1111/j.1558->
- 1208 5646.2011.01486.x
- 1209 Rudh, A., Qvarnström, A., 2013. Adaptive colouration in amphibians. *Semin. Cell Dev. Biol.*,
- 1210 Genetic basis and evolutionary causes of colour variation in vertebrates 24, 553–561.
- 1211 <https://doi.org/10.1016/j.semcdb.2013.05.004>
- 1212 Sarkar, A., Hochedlinger, K., 2013. The Sox Family of Transcription Factors: Versatile
- 1213 Regulators of Stem and Progenitor Cell Fate. *Cell Stem Cell* 12, 15–30.
- 1214 <https://doi.org/10.1016/j.stem.2012.12.007>
- 1215 Schneider, A., David, V.A., Johnson, W.E., O'Brien, S.J., Barsh, G.S., Menotti-Raymond, M.,
- 1216 Eizirik, E., 2012. How the Leopard Hides Its Spots: ASIP Mutations and Melanism in
- 1217 Wild Cats. *PLOS ONE* 7, e50386. <https://doi.org/10.1371/journal.pone.0050386>
- 1218 Shefchek, K.A., Harris, N.L., Gargano, M., Matentzoglou, N., Unni, D., Brush, M., Keith, D.,
- 1219 Conlin, T., Vasilevsky, N., Zhang, X.A., Balhoff, J.P., Babb, L., Bello, S.M., Blau, H.,
- 1220 Bradford, Y., Carbon, S., Carmody, L., Chan, L.E., Cipriani, V., Cuzick, A.,
- 1221 Della Rocca, M., Dunn, N., Essaid, S., Fey, P., Grove, C., Gourdine, J.-P., Hamosh,
- 1222 A., Harris, M., Helbig, I., Hoatlin, M., Joachimiak, M., Jupp, S., Lett, K.B., Lewis, S.E.,
- 1223 McNamara, C., Pendlington, Z.M., Pilgrim, C., Putman, T., Ravanmehr, V., Reese, J.,
- 1224 Riggs, E., Robb, S., Roncaglia, P., Seager, J., Segerdell, E., Similuk, M., Storm, A.L.,
- 1225 Thaxon, C., Thessen, A., Jacobsen, J.O.B., McMurry, J.A., Groza, T., Köhler, S.,
- 1226 Smedley, D., Robinson, P.N., Mungall, C.J., Haendel, M.A., Munoz-Torres, M.C.,
- 1227 Osumi-Sutherland, D., 2020. The Monarch Initiative in 2019: an integrative data and
- 1228 analytic platform connecting phenotypes to genotypes across species. *Nucleic Acids*
- 1229 *Res.* 48, D704–D715. <https://doi.org/10.1093/nar/gkz997>
- 1230 Simões-Costa, M., Bronner, M.E., 2015. Establishing neural crest identity: a gene regulatory
- 1231 recipe. *Development* 142, 242–257. <https://doi.org/10.1242/dev.105445>
- 1232 Singh, A.P., Nüsslein-Volhard, C., 2015. Zebrafish Stripes as a Model for Vertebrate Colour
- 1233 Pattern Formation. *Curr. Biol.* 25, R81–R92.
- 1234 <https://doi.org/10.1016/j.cub.2014.11.013>
- 1235 Slate, J., 2013. From Beavis to Beak Color: A Simulation Study to Examine How Much Qtl
- 1236 Mapping Can Reveal About the Genetic Architecture of Quantitative Traits. *Evolution*
- 1237 67, 1251–1262. <https://doi.org/10.1111/evo.12060>
- 1238 Spiewak, J.E., Bain, E.J., Liu, J., Kou, K., Sturiale, S.L., Patterson, L.B., Diba, P., Eisen,
- 1239 J.S., Braasch, I., Ganz, J., Parichy, D.M., 2018. Evolution of Endothelin signaling and
- 1240 diversification of adult pigment pattern in Danio fishes. *PLOS Genet.* 14, e1007538.
- 1241 <https://doi.org/10.1371/journal.pgen.1007538>
- 1242 Stern, D.L., Orgogozo, V., 2009. Is Genetic Evolution Predictable? *Science* 323, 746–751.
- 1243 <https://doi.org/10.1126/science.1158997>
- 1244 Stern, D.L., Orgogozo, V., 2008. The Loci of Evolution: How Predictable Is Genetic
- 1245 Evolution? *Evolution* 62, 2155–2177. <https://doi.org/10.1111/j.1558->
- 1246 5646.2008.00450.x
- 1247 Tanaka, J., Leeb, T., Rushton, J., Famula, T.R., Mack, M., Jagannathan, V., Flury, C.,
- 1248 Bachmann, I., Eberth, J., McDonnell, S.M., Penedo, M.C.T., Bellone, R.R., 2019.
- 1249 Frameshift Variant in MFSD12 Explains the Mushroom Coat Color Dilution in
- 1250 Shetland Ponies. *Genes* 10, 826. <https://doi.org/10.3390/genes10100826>
- 1251 Toews, D.P.L., Hofmeister, N.R., Taylor, S.A., 2017. The Evolution and Genetics of
- 1252 Carotenoid Processing in Animals. *Trends Genet.* 33, 171–182.
- 1253 <https://doi.org/10.1016/j.tig.2017.01.002>
- 1254 Toews, D.P.L., Taylor, S.A., Vallender, R., Brelsford, A., Butcher, B.G., Messer, P.W.,
- 1255 Lovette, I.J., 2016. Plumage Genes and Little Else Distinguish the Genomes of
- 1256 Hybridizing Warblers. *Curr. Biol.* 26, 2313–2318.
- 1257 <https://doi.org/10.1016/j.cub.2016.06.034>
- 1258 Toomey, M.B., Lopes, R.J., Araújo, P.M., Johnson, J.D., Gazda, M.A., Afonso, S., Mota,
- 1259 P.G., Koch, R.E., Hill, G.E., Corbo, J.C., Carneiro, M., 2017. High-density lipoprotein

1260 receptor SCARB1 is required for carotenoid coloration in birds. *Proc. Natl. Acad. Sci.*  
1261 114, 5219–5224. <https://doi.org/10.1073/pnas.1700751114>  
1262 Toomey, M.B., Marques, C.I., Andrade, P., Araújo, P.M., Sabatino, S., Gazda, M.A., Afonso,  
1263 S., Lopes, R.J., Corbo, J.C., Carneiro, M., 2018. A non-coding region near Follistatin  
1264 controls head colour polymorphism in the Gouldian finch. *Proc. R. Soc. B Biol. Sci.*  
1265 285, 20181788. <https://doi.org/10.1098/rspb.2018.1788>  
1266 Worth, C.L., Gong, S., Blundell, T.L., 2009. Structural and functional constraints in the  
1267 evolution of protein families. *Nat. Rev. Mol. Cell Biol.* 10, 709–720.  
1268 <https://doi.org/10.1038/nrm2762>
